1 **Simultaneous inhibition of human CD4 and 4-1BB**  
2 **biogenesis suppresses cytotoxic T lymphocyte proliferation**

3

4 Elisa Claeys<sup>1</sup>, Eva Pauwels<sup>1</sup>, Stephanie Humblet-Baron<sup>2</sup>, Dominique  
5 Schols<sup>1</sup>, Mark Waer<sup>3</sup>, Ben Sprangers<sup>4</sup>, Kurt Vermeire<sup>1\*</sup>

6

7 <sup>1</sup>KU Leuven Department of Microbiology, Immunology and Transplantation, Laboratory of Virology and  
8 Chemotherapy, Rega Institute, Leuven, B-3000, Belgium

9 <sup>2</sup>KU Leuven Department of Microbiology, Immunology and Transplantation, Laboratory of Adaptive  
10 Immunology, Leuven, B-3000, Belgium

11 <sup>3</sup>KU Leuven Department of Microbiology, Immunology and Transplantation, Laboratory of Tracheal  
12 Transplantation, Leuven, B-3000, Belgium

13 <sup>4</sup>KU Leuven Department of Microbiology, Immunology and Transplantation, Laboratory of Molecular  
14 Immunology, Leuven, B-3000, Belgium

15

16 \*For correspondence: [kurt.vermeire@kuleuven.be](mailto:kurt.vermeire@kuleuven.be)

17 ORCID iD: Kurt Vermeire: 0000-0003-1123-1907

18 **ABSTRACT**

19 The small molecule cyclotriazadisulfonamide (CADA) down-modulates the human CD4  
20 receptor, an important factor in T cell activation. Here, we addressed the immunosuppressive  
21 potential of CADA using *in vitro* activation models. CADA inhibited lymphocyte proliferation in  
22 a mixed lymphocyte reaction, and when human PBMCs were stimulated with CD3/CD28 beads  
23 or phytohemagglutinin. The immunosuppressive effect of CADA involved both CD4<sup>+</sup> and CD8<sup>+</sup>  
24 T cells but was, surprisingly, most prominent in the CD8<sup>+</sup> T cell subpopulation where it inhibited  
25 cell-mediated lympholysis. We discovered a direct down-modulatory effect of CADA on 4-1BB  
26 (CD137) expression, a survival factor for activated CD8<sup>+</sup> T cells. More specifically, CADA  
27 blocked 4-1BB protein biosynthesis by inhibition of its co-translational translocation across the  
28 ER membrane in a signal peptide-dependent way. This study demonstrates that CADA, as  
29 potent down-modulator of human CD4 and 4-1BB, has promising *in vitro* immunomodulatory  
30 characteristics for future *in vivo* exploration as immunosuppressive drug.

31

32

33 **KEYWORDS**

34 Cyclotriazadisulfonamide, CADA, CD4 receptor, T cell activation, immunosuppression, 4-1BB,  
35 CD137, signal peptide, ER, co-translational translocation

36

37 **ABBREVIATIONS**

38 CADA, cyclotriazadisulfonamide; CD, cluster of differentiation; CTPS1, cytidine triphosphate  
39 synthase 1; ER, endoplasmic reticulum; hCD4, human CD4; IL, interleukin; Lck, lymphocyte  
40 C-terminal Src kinase; mCD4, murine CD4; MLR, mixed lymphocyte reaction; MMF,  
41 mycophenolate mofetil; PBMC, peripheral blood mononuclear cell; PHA, phytohemagglutinin;  
42 pSTAT5, phosphorylated signal transducer and activator of transcription 5; sCD25, soluble  
43 CD25; SP, signal peptide

## 44 INTRODUCTION

45 The cluster of differentiation 4 (CD4) receptor is a type I integral membrane protein consisting  
46 of four extracellular immunoglobulin-like domains, a spanning transmembrane region and a  
47 short cytoplasmic tail (Maddon et al., 1985). The lymphocyte C-terminal Src kinase (Lck)  
48 non-covalently interacts with the cytoplasmic tail of CD4 (Shaw et al., 1989). Next to its function  
49 in CD4 signaling, Lck inhibits endocytosis of the CD4 receptor by preventing the entry of CD4  
50 into clathrin-coated pits (Pelchen-Matthews et al., 1992). Several immune cell types express  
51 the CD4 receptor with T helper cells expressing the highest levels, followed by monocytes that  
52 express already 10- to 20-fold less CD4 compared to T cells (Collman et al., 1990). Studies in  
53 CD4 null mice underline the role of the CD4 receptor in positive thymic selection and  
54 development of helper T cells (Rahemtulla et al., 1991).

55 The CD4 receptor is also crucial for proper immune function, especially during T cell activation  
56 in which it can fulfil several roles (Claeys et al., 2019). The CD4 receptor can exert an  
57 intercellular adhesion function by stabilizing the interaction between the T cell receptor on  
58 CD4<sup>+</sup> T cells and the major histocompatibility complex class II on antigen-presenting cells  
59 (Janeway, 1989). More important are the signaling function of the CD4 receptor in T cell  
60 activation through Lck and the enhancement of T cell sensitivity to antigens mediated by CD4  
61 (Konig et al., 2004; Krogsgaard et al., 2005). Besides its role in T cell activation, the CD4  
62 receptor is suggested to be involved in peripheral T cell differentiation towards the T helper 2  
63 subset and in the chemotactic response of CD4<sup>+</sup> T cells towards interleukin (IL)-16 (Cruikshank  
64 et al., 1991; Fowell et al., 1997). Additionally, different functions are attributed to the CD4  
65 receptor in other types of immune cells including natural killer and dendritic cells (Bernstein et  
66 al., 2006; Bialecki et al., 2011). The important role of the CD4 receptor in the immune system  
67 has been further demonstrated by the *in vitro* and *in vivo* immunosuppressive potential of  
68 non-depleting anti-CD4 monoclonal antibodies (Mayer et al., 2013; Schulze-Koops et al., 2000;  
69 Winsor-Hines et al., 2004).

70 In the field of virology, attachment of viral gp120 of human immunodeficiency virus (HIV) to the  
71 cellular CD4 receptor initiates HIV infection of target cells (Dalglish et al., 1984; Klatzmann et

72 al., 1984). From an antiviral screen, the small molecule cyclotriazadisulfonamide (CADA) was  
73 identified as a potent inhibitor of HIV infection (Vermeire et al., 2002). The antiviral effect of  
74 this synthetic macrocycle is due to down-modulation of the CD4 protein, the primary entry  
75 receptor for HIV (Vermeire et al., 2003). This down-modulating activity of CADA is reversible  
76 *in vitro*: when treatment is ceased, cellular CD4 expression is rapidly restored to normal levels  
77 (Vermeire et al., 2007). Additionally, CADA does not compromise cellular viability as was  
78 demonstrated by long-term (about 1 year) exposure of a T cell line to CADA, with full recovery  
79 of CD4 expression when treatment was terminated (Vermeire et al., 2014). The sensitivity of  
80 the CD4 receptor to CADA is species-specific, as expression of murine CD4 (mCD4) was not  
81 affected by CADA, while primary T cells of macaques responded in a similar way as human T  
82 cells. Mechanistically, CADA was shown to inhibit endoplasmic reticulum (ER) co-translational  
83 translocation of the human CD4 (hCD4) pre-protein in a signal peptide (SP)-dependent way  
84 (Vermeire et al., 2014). CADA selectively binds to the SP of hCD4, thereby locking it in an  
85 intermediate conformation inside the Sec61 translocon channel during co-translational  
86 translocation through the ER membrane, finally resulting in proteasomal degradation in the  
87 cytosol of the mistranslocated hCD4 precursor molecules. The CADA-sensitive region of hCD4  
88 consists primarily of the hydrophobic core of the hCD4 SP, although the presence of charged  
89 residues in the N-terminal portion of the mature protein enhances sensitivity (Van Puyenbroeck  
90 et al., 2020). Almost no binding of CADA to the mCD4 SP was detected, explaining the  
91 observed resistance of mCD4 to CADA (Vermeire et al., 2014).

92 Thus, CADA down-modulates the CD4 receptor, a key component in T cell activation.  
93 Therefore, we explored in this study whether CADA has a potential immunomodulatory  
94 capacity. Here, CADA was evaluated in several *in vitro* models of T cell activation and was  
95 found to exert a clear immunosuppressive effect. Furthermore, in addition to the earlier  
96 reported CD4 receptor, we identified 4-1BB – a crucial co-stimulatory factor in T cell activation  
97 of mainly cytotoxic lymphocytes – as a new target of CADA.

98 **RESULTS**

99

100 ***CADA down-modulates the human CD4 receptor and has an immunosuppressive effect***  
101 ***in the mixed lymphocyte reaction***

102 In line with our previous report (Vermeire et al., 2014), the small molecule CADA (**Figure 1A**)  
103 dose-dependently down-modulated the hCD4 receptor on Jurkat T cells as well as on human  
104 peripheral blood mononuclear cells (PBMCs) (**Figure 1B**). At a concentration of 10  $\mu$ M CADA,  
105 the cell surface hCD4 expression level was greatly reduced in both cell types: 86% reduction  
106 in hCD4 expression for Jurkat cells and 74% for PBMCs, as compared to untreated control  
107 cells (IC<sub>50</sub> values of 0.41  $\mu$ M and 0.94  $\mu$ M, respectively). Based on this hCD4 receptor down-  
108 modulating potency of CADA, we addressed whether CADA has a potential  
109 immunomodulatory capacity in human cells. In a first approach, the effect of CADA was  
110 evaluated in T cells activated *in vitro* by means of superantigens. Limited or no inhibitory effect  
111 of CADA on the expression of the early activation marker CD69 was observed when Jurkat T  
112 cells were activated by the superantigen staphylococcal enterotoxin E (SEE), nor when naive  
113 CD4<sup>+</sup> T cells were activated by SEE or staphylococcal enterotoxin B (SEB) (**Figure 1–figure**  
114 **supplement 1**). However, CADA significantly inhibited lymphocyte proliferation in the mixed  
115 lymphocyte reaction (MLR) in which PBMCs are co-cultured with mitomycin-inactivated  
116 stimulator B cells (**Figure 1C**). Although lymphocyte proliferation was not blocked completely,  
117 there was a strong dose-dependent inhibitory effect of CADA. The antiproliferative  
118 immunosuppressive agent mycophenolate mofetil (MMF), included as control, evoked a  
119 stronger maximal inhibitory effect, with complete inhibition of lymphocyte proliferation at a dose  
120 of 2  $\mu$ M of MMF and higher (**Figure 1C**). Viability of Jurkat cells cultured in the presence of  
121 CADA was not affected for concentrations up to 50  $\mu$ M as determined by trypan blue staining  
122 (**Figure 1–figure supplement 2**), and only a small reduction in metabolic activity (as quantified  
123 by MTS-PES) was observed for higher doses of CADA that reached significance at a  
124 concentration of 50  $\mu$ M (**Figure 1D**). In contrast, a reduction in cell viability (**Figure 1–figure**

125 **supplement 2**) and a significant dose-dependent inhibition of metabolic activity was observed  
126 for cells treated with MMF (**Figure 1D**).

127

### 128 ***Reduced CD4 surface expression affects lymphocyte proliferation in the MLR***

129 As CADA down-modulates the hCD4 receptor, we next investigated if reduced cell surface  
130 CD4 expression correlates with inhibition of lymphocyte proliferation. Therefore, we compared  
131 CADA with another agent that directly targets the hCD4 receptor, namely the non-depleting  
132 anti-CD4 monoclonal antibody Clenoliximab (Hepburn et al., 2003). PBMCs were co-cultured  
133 with mitomycin-inactivated RPMI1788 cells in the presence of the compound, and at day five,  
134 the sample was evaluated for CD4 expression by flow cytometry. In parallel, an identical  
135 sample was exposed to [<sup>3</sup>H]-thymidine to measure the proliferation response 18h later. CADA-  
136 treatment resulted in a consistent dose-dependent reduction in CD4 expression, that reached  
137 a plateau at 2  $\mu$ M of CADA (**Figure 2**, left panel). Treatment with Clenoliximab also had a CD4  
138 down-modulating effect but this was less effective and more variable as compared to CADA  
139 (**Figure 2**, right panel). In addition, there was an inhibitory effect of Clenoliximab seen on  
140 lymphocyte proliferation, although rather limited (about 30% reduction) and less evident as the  
141 reduction in CD4 expression (**Figure 2**). For CADA, a clear dose-dependent inhibition of  
142 lymphocyte proliferation was observed (**Figure 2**, left panel). However, whereas CD4 reduction  
143 plateaued at 2  $\mu$ M of CADA, a steady decrease in lymphocyte proliferation was measured with  
144 increasing doses of CADA. This suggests that for CADA (an) additional immunomodulatory  
145 effect(s) are at play beyond suppression of CD4 receptor expression.

146

### 147 ***CADA suppresses lymphocyte proliferation and inhibits upregulation of CD4 and CD8*** 148 ***after activation by CD3/CD28 beads or PHA***

149 To further explore the inhibitory effect of CADA on lymphocyte proliferation, we evaluated  
150 CADA in two additional *in vitro* models of T cell activation. The first one, referred to as  
151 CD3/CD28 beads stimulation assay, is based on the use of inert, superparamagnetic beads to  
152 which anti-CD3 and anti-CD28 antibodies are covalently coupled. The second model is by

153 addition of phytohemagglutinin (PHA), a lectin that binds to sugars on glycosylated surface  
154 proteins, including the TCR and CD3, thereby crosslinking them. Briefly, PBMCs were pre-  
155 incubated with a fixed dose of CADA (10  $\mu$ M) or DMSO control for 3 days before activation by  
156 CD3/CD28 beads or PHA. In both models, the proliferation response of lymphocytes in the  
157 control samples steadily increased over time in all donors, with a peak at day 3 post activation  
158 (**Figure 3**; open symbols). Treatment with CADA suppressed the responsiveness of  
159 lymphocytes to both CD3/CD28 beads and PHA (**Figure 3**; solid red symbols). Intra-donor  
160 analysis revealed that CADA significantly reduced cell proliferation compared to DMSO control  
161 in both models at day 1 and 2 post activation, as further exemplified by the insert panels of  
162 **Figure 3** ( $p = 0.002$  and  $p = 0.003$  for CD3/CD28 and PHA, respectively; paired t-test).

163 In addition to the proliferation response, we analyzed the expression level of cell surface CD4  
164 and CD8, receptors known to be involved in T cell activation. As expected, basal CD4  
165 expression on CD4<sup>+</sup> T cells measured at time point 0, which is after 3 days of CADA pre-  
166 incubation, was decreased by half in the CADA-treated samples (**Figure 4A**, **Figure 4–figure**  
167 **supplement 1**). In control CD4<sup>+</sup> T cells (treated with DMSO) cell surface CD4 expression was  
168 strongly upregulated starting from day 1 post activation by CD3/CD28 beads and by PHA  
169 (**Figure 4A**). In sharp contrast, in both activation models CADA completely blocked this  
170 induced CD4 upregulation in all donors and at every tested time point (**Figure 4A**, **Figure 4–**  
171 **figure supplement 1**), a result of the complete inhibition of hCD4 protein biogenesis by CADA  
172 (Vermeire et al., 2014). In the CD8<sup>+</sup> T cell population, basal CD8 expression was also partially  
173 affected by pre-treatment with CADA (**Figure 4B**, **Figure 4–figure supplement 1**). Intra-donor  
174 flow cytometric analysis of the samples revealed that the mean fluorescence intensity (MFI)  
175 for CD8 receptor expression in the CADA-treated cells was reduced by  $38 \pm 4\%$  (mean  $\pm$  SD;  
176 **Figure 4–figure supplement 1**, d0). After activation by CD3/CD28 beads and PHA, CD8  
177 expression was upregulated in the control samples, starting at day 1 and with a continuous  
178 increase over the next days. Exposure of the cells to CADA clearly suppressed this activation-  
179 triggered CD8 upregulation (**Figure 4B**). However, from day 3 onwards, CD8 levels started to  
180 rise in the CADA-treated samples, which was most prominent in the PHA-stimulated cells



181 (**Figure 4B**, right panel). Consequently, the suppression of CADA on CD8 receptor  
182 upregulation in these cells plateaued around 50% (**Figure 4–figure supplement 1**).

183

#### 184 ***CADA dose-dependently inhibits CD8<sup>+</sup> T cell proliferation and cytotoxic T cell function***

185 As CADA treatment resulted in lower expression of the CD8 receptor on CD8<sup>+</sup> T cells, the  
186 effect of CADA on CD8<sup>+</sup> T cell function was further examined. To this purpose, an MLR was  
187 performed with total PBMCs, purified CD4<sup>+</sup> T cells or purified CD8<sup>+</sup> T cells. Generally, the  
188 proliferation response of purified CD8<sup>+</sup> T cells was much weaker for each donor in comparison  
189 to the proliferation response of purified CD4<sup>+</sup> T cells (data not shown). As demonstrated in  
190 **Figure 5A**, CADA dose-dependently suppressed the proliferation of purified CD4<sup>+</sup> T cells,  
191 although to a lesser extent as compared to total PBMCs. Remarkably, CADA profoundly and  
192 dose-dependently inhibited the proliferation of purified CD8<sup>+</sup> T cells, in a similar way as that of  
193 total PBMCs. In addition, the proliferation of purified CD8<sup>+</sup> T cells by PHA or beads stimulation  
194 was clearly suppressed by CADA (**Figure 5B**). This indicates that the suppressive effect of  
195 CADA on lymphocyte activation is mostly affecting the CD8<sup>+</sup> subpopulation and, thus,  
196 independent of CD4 expression.

197 Next, to evaluate the effect of CADA on the cytotoxic potential of CD8<sup>+</sup> T cells, a cell-mediated  
198 lympholysis assay was performed. PBMCs cultured in medium without stimulator cells did not  
199 show notable cytotoxic activity (3% of specific lysis; black bar in **Figure 5C**). However, when  
200 PBMCs were co-cultured with mitomycin C-inactivated RPMI1788 cells, cytotoxic activity  
201 increased considerably (71% of specific lysis; white bar in **Figure 5C**). Interestingly, treatment  
202 with CADA reduced this cytotoxic response dose-dependently (77% inhibition of specific lysis  
203 with 50  $\mu$ M of CADA, and 53% with 10  $\mu$ M of CADA; red bars in **Figure 5C**). At lower  
204 concentrations of CADA, cell-mediated lympholysis was no longer inhibited.

205

#### 206 ***CADA decreases CD25 upregulation and reduces intracellular pSTAT5 and CTPS1*** 207 ***levels in activated PBMCs***



208 Expression of the late activation marker CD25 (also known as the low affinity IL-2 receptor  $\alpha$ -  
209 chain) was determined on both CD4<sup>+</sup> T cells and CD8<sup>+</sup> T cells (**Figure 6A**). Without activation  
210 stimuli, very low levels of CD25 were measured, however, CD25 expression was strongly  
211 induced starting at 4h post PHA-activation, reaching a peak around day 2 to 3 (**Figure 6A**).  
212 Comparable data were obtained with CD3/CD28 beads activation (**Figure 6–figure**  
213 **supplement 1A**). Although CADA pre-incubation had no effect on basal CD25 levels (**Figure**  
214 **6–figure supplement 1B**; d0), treatment of the cells with CADA inhibited CD25 upregulation  
215 in each T cell subset and in both activation models. As shown in **Figure 6A** (insert panels),  
216 CADA significantly suppressed CD25 expression at day 3 ( $p < 0.05$ ; paired t-test). Though, at  
217 day 4 post activation the inhibitory effect of CADA was less distinct because CD25 expression  
218 already declined in most control samples, whereas it stabilized in CADA-treated cells (**Figure**  
219 **6A, Figure 6–figure supplement 1**). In accordance with cell surface expression of CD25, the  
220 level of soluble CD25 (sCD25) in the supernatant of stimulated cells was also reduced by  
221 CADA treatment (**Figure 6–figure supplement 2**), which was significant for the PHA-  
222 stimulated samples that were collected at day 4.

223 Transcription of CD25 is enhanced by IL-2 receptor signaling, including activation by  
224 phosphorylation of signal transducer and activator of transcription 5 (STAT5). Next, levels of  
225 intracellular pSTAT5 and cell surface CD25 were measured simultaneously in PBMCs that  
226 were left unstimulated or that were activated by CD3/CD28 beads and PHA. Half of the  
227 samples were given an extra boost with exogenous IL-2. As shown in **Figure 6B**, most potent  
228 induction of CD25 expression in total PBMCs was obtained by PHA stimulation rather than by  
229 the use of CD3/CD28 beads. This CD25 upregulation, in the absence or presence of  
230 exogenous IL-2, was significantly suppressed by CADA ( $p = 0.001$  and  $0.007$ , respectively; t-  
231 test). Activation with CD3/CD28 beads, in combination with exogenous IL-2 also resulted in  
232 detectable levels of CD25 (**Figure 6B**). Intracellular pSTAT5 levels were clearly elevated after  
233 activation, with the largest increase for the PHA-stimulated samples (**Figure 6C**). By adding  
234 exogenous IL-2 a general increase in pSTAT5 was seen in all tested conditions. Interestingly,

235 CADA clearly reduced the levels of pSTAT5 (as compared to the corresponding DMSO  
236 control), which reached significance for the samples without IL-2 boost (*Figure 6C*, red bars).  
237 In addition, the expression level of cytidine triphosphate synthase 1 (CTPS1) – an important  
238 immune checkpoint in T cell responses – was determined as its transcription is induced by  
239 activated STAT5. CTPS1 is highly upregulated after stimulation and it has been reported to be  
240 crucial for proliferation of T and B cells after activation (Martin et al., 2014). As shown in *Figure*  
241 *6D*, in unstimulated cells low basal levels of CTPS1 were detected by means of western blot,  
242 while enhanced expression was observed after activation by CD3/CD28 beads and PHA.  
243 Importantly, CADA clearly attenuated this activation-induced CTPS1 upregulation (*Figure 6D*).

244

245 ***CADA inhibits cytokine release by activated PBMCs and suppresses the upregulation***  
246 ***of co-stimulatory molecules***

247 Our first set of data indicated that CADA attenuates the general activation of T lymphocytes.  
248 To explore the immunosuppressive effect of CADA in more detail, we next analyzed the impact  
249 of CADA on the cytokine release by the proliferating lymphocytes. Supernatant was taken from  
250 PBMCs either stimulated by mitomycin C inactivated RPMI1788 cells (MLR), CD3/CD28 beads  
251 or PHA and analyzed for three representative Th1 cytokines. As summarized in *Figure 7A*,  
252 CADA generally suppressed the level of IL-2, IFN- $\gamma$  and TNF- $\alpha$  in the three activation models,  
253 which reached significance for the cytokines detected in the MLR samples. TNF- $\alpha$  was  
254 significantly reduced by CADA treatment in all three models ( $p < 0.05$ ; t-test).

255 In addition to the cytokine response of lymphocytes, we evaluated the expression level of  
256 CD28, a key co-stimulatory receptor in T cell activation. As depicted in *Figure 7-figure*  
257 *supplement 1*, cell surface CD28 expression levels started to rise at day 2 post activation.  
258 Treatment with CADA resulted in a significant reduction in CD28 levels of CD4<sup>+</sup> and CD8<sup>+</sup> T  
259 cells, both after CD3/CD28 and PHA stimulation (*Figure 7B, Figure 7-figure supplement 1*).  
260 By day 3 post activation, CD28 expression levels generally increased also in the CADA-  
261 exposed samples (*Figure 7-figure supplement 1*), indicating that CADA-treatment resulted

262 in a delayed upregulation of CD28 rather than a complete and sustained suppression of this  
263 co-receptor.

264 Cell surface levels of the human co-stimulatory receptors tumor necrosis factor receptor  
265 superfamily [TNFRSF] member 4 (TNFRSF4), also named OX40 or CD134, and 4-1BB (also  
266 named CD137 or TNFRSF9) were assessed after activation by CD3/CD28 beads or PHA.  
267 OX40 is transiently expressed after antigen recognition primarily on activated CD4<sup>+</sup> T cells  
268 found preferentially at the site of inflammation (Lane, 2000; Weinberg, 2002). Expression of  
269 4-1BB is highly induced in CD8<sup>+</sup> T and NK lymphocytes upon activation via CD3-TCR  
270 engagement. It exerts regulatory effects on T cells mediating activation and persistence of  
271 CD8<sup>+</sup> T lymphocytes (Kwon et al., 2000; Shuford et al., 1997; Vinay et al., 1998). As shown in  
272 **Figure 7B**, activation of the control cells evoked a strong but variable upregulation of OX40,  
273 with higher elevated levels after stimulation with PHA as compared to CD3/CD28 beads  
274 activation. The suppressive effect of CADA on OX40 upregulation was rather weak in PHA-  
275 stimulated cells ( $13 \pm 12\%$  reduction in MFI), though it was more pronounced ( $51 \pm 19\%$   
276 reduction in MFI) and reached statistical significance in the case of CD3/CD28 beads activation  
277 ( $p = 0.0064$ ; paired t-test). The most striking effect was observed for 4-1BB expression. In both  
278 activation models, an uniform increase in 4-1BB expression was measured in the DMSO  
279 control samples of the four different donors (**Figure 7B**). In sharp contrast, CADA nearly  
280 completely blocked the upregulation of 4-1BB in all samples ( $89 \pm 4\%$  and  $79 \pm 3\%$  reduction  
281 in MFI for CD3/CD8 and PHA, respectively), which was highly significant ( $p = 0.0025$  and  
282  $0.0011$ , respectively; paired t-test).

283

#### 284 ***CADA dose-dependently and reversibly suppresses the cellular expression of 4-1BB***

285 Further analysis of 4-1BB kinetics indicated that the transient expression of 4-1BB in CD8<sup>+</sup> T  
286 cells starts as early as 12h post stimulation and lasts for approximately 36h, whereas its  
287 expression in CD4<sup>+</sup> T cells peaks around 48h post stimulation (**Figure 8**). Importantly, CADA  
288 completely abrogated the 4-1BB upregulation in both CD8<sup>+</sup> and CD4<sup>+</sup> T cells (**Figure 8**, red  
289 curves). These data suggest that CADA might have a direct inhibitory effect on the receptor

290 biogenesis of 4-1BB, similar to that of CD4. To address this, we cloned 4-1BB in a vector to  
291 express the receptor fused to turbo green fluorescent protein (tGFP) in a P2A-RFP context  
292 (**Figure 9A**), as described previously (Van Puyenbroeck et al., 2020). As a positive control,  
293 hCD4 was included. The same reporter vector was also used to express other co-stimulatory  
294 receptors from the same genetic background. Protein expression was determined by tGFP  
295 fluorescence, while the amount of cytosolic RFP served as a control for transfection and  
296 expression efficiency. As shown in **Figure 9B**, CADA dose-dependently inhibited 4-1BB  
297 expression in transfected HEK293T cells. This direct down-modulatory effect of CADA on  
298 4-1BB was almost complete and similar to its effect on hCD4 (IC<sub>50</sub> of 0.24 μM and 0.30 μM,  
299 respectively), demonstrating that 4-1BB is a valuable substrate of CADA (**Figure 9B**). The  
300 down-modulating effect of CADA on 4-1BB is reversible in nature, as evidenced by the re-  
301 expression of 4-1BB after wash-out of CADA (**Figure 9C**), an effect that is observed for hCD4  
302 as well (**Figure 9-figure supplement 1**) as reported earlier (Vermeire et al., 2014; Vermeire  
303 et al., 2007). As summarized in **Figure 9D**, in addition to the potent inhibition of hCD4 and  
304 4-1BB expression, CADA also partially reduced cellular levels of other co-stimulatory receptors  
305 in transfected cells. Whereas the level of CD8 and OX40 in CADA treated cells was reduced  
306 by approximately 40%, the effect of CADA on the expression of CD25 and CD69 was only  
307 minor. A reduction of 60% was measured in the expression of CD28 in CADA exposed cells  
308 (**Figure 9D, Figure 9-figure supplement 2**).

309

310 ***CADA inhibits 4-1BB protein biogenesis is a signal peptide-dependent way by blocking***  
311 ***the co-translational translocation of 4-1BB into the endoplasmic reticulum***

312 Finally, to explore the molecular mechanism by which CADA inhibits 4-1BB protein expression,  
313 we addressed if the cleavable signal peptide (SP) of the 4-1BB pre-protein is the susceptible  
314 region for CADA activity, similar to what we have described for hCD4 (Van Puyenbroeck et al.,  
315 2020; Vermeire et al., 2014). Thus, constructs were generated as depicted in **Figure 10A**.  
316 Briefly, starting from the CADA-resistant mouse CD4 (mCD4) protein sequence, we  
317 exchanged the N-terminal region containing the SP and the first 7 amino acids of the mature

318 protein of mCD4 with that of hCD4 or 4-1BB, respectively. As previously demonstrated  
319 (Vermeire et al., 2014), CADA did not affect the expression of wild-type mouse CD4 when  
320 transfected in HEK293T cells (**Figure 10B**). Expectedly, mCD4 could be fully sensitized to  
321 CADA by substituting the mCD4 SP and the first 7 amino acids of the mature mCD4 protein  
322 by the human sequence (hmCD4 construct; **Figure 10B**), confirming that CADA-sensitivity  
323 depends on the presence of a hCD4 SP. Interestingly, expression of mouse CD4 could also  
324 be dose-dependently down-modulated by CADA when mCD4 contained the 4-1BB SP and 7  
325 AA of the mature 4-1BB protein. In fact, 4-1BBmCD4 was slightly more affected by CADA as  
326 compared to the hmCD4 chimaera, as evidenced by the IC<sub>50</sub> values for receptor down-  
327 modulation (0.38 and 0.84  $\mu$ M, respectively) (**Figure 10B**).

328 Signal peptides are critical targeting sequences for secretory and type I integral membrane  
329 proteins to guide these proteins to the secretory pathway (von Heijne, 1985; Wickner et al.,  
330 2005). They are involved in the correct targeting of translating ribosomes to the endoplasmic  
331 reticulum (ER) membrane, and the subsequent selective translocation of secretory and type I  
332 integral membrane proteins across the Sec61 translocon channel in the ER membrane (Hegde  
333 et al., 2008; Rapoport, 2007). By the use of a cell free *in vitro* translation/translocation assay  
334 (Vermeire et al., 2015), we next evaluated the impact of CADA specifically on the translocation  
335 step of 4-1BB (**Figure 10–figure supplement 1**). Briefly, transcripts of full length 4-1BB were  
336 translated *in vitro* into a pre-protein of approximately 30 kDa, containing its SP (**Figure 10D**,  
337 top panel, first lane). By adding microsomal membranes, representing the ER, combined  
338 translation and translocation can occur, resulting in SP-cleaved proteins that are further  
339 glycosylated in the ER lumen by the oligosaccharyltransferase (OST) complex (**Figure 10–**  
340 **figure supplement 1A**). As shown in **Figure 10D**, wild-type 4-1BB is efficiently translocated  
341 into the lumen of the microsomal membranes, as evidenced by the higher molecular weight  
342 band on the gel representing the translocated (thus, glycosylated) 4-1BB species. However,  
343 addition of CADA to this translocation mixture strongly reduced the fraction of translocated  
344 protein, demonstrating that CADA specifically inhibits the protein translocation step of 4-1BB  
345 (**Figure 10C**). In contrast, CADA had no effect on the translocation of wild-type truncated

346 mCD4 (without glycosylation sites), as evidenced by the equal amount of faster migrating SP-  
347 cleaved species (*Figure 10C* and *Figure 10D*, bottom panel). These data demonstrate that  
348 CADA specifically inhibits the co-translational translocation of 4-1BB across the ER membrane  
349 in a signal peptide-dependent manner (*Figure 10E*).

## 350 **DISCUSSION**

351 This study aimed at evaluating the immunosuppressive potential of CADA, a small molecule  
352 that blocks hCD4 protein biosynthesis in a SP-dependent way and thereby reduces cell surface  
353 hCD4 expression to low basal level. Here, we demonstrated a consistent dose-dependent  
354 inhibitory effect of CADA on lymphocyte proliferation in a MLR setting. The inhibition of  
355 lymphocyte proliferation by CADA was milder than by the currently used anti-proliferative  
356 immunosuppressive agent MMF. Although less potent, CADA has the major advantage that it  
357 exerted no cellular toxicity and it was barely cytostatic *in vitro*, both promising beneficial  
358 characteristics of an immunosuppressive drug. In addition, the biological effect of CADA is  
359 reversible as evidenced by the quick re-expression of the targeted receptors when treatment  
360 was terminated. CADA had little suppressive effect on superantigen-induced activation of T  
361 cells. This can be explained by the unique binding of superantigens, which occurs outside the  
362 normal peptide-binding groove and thus without intracellular processing (Marrack et al., 1990).  
363 Interactions between superantigen and TCR or MHC are most likely of sufficiently high affinity  
364 to obviate the contribution of the CD4 receptor in this activation process (Killeen et al., 1993),  
365 explaining the lack of a significant suppressive effect of CADA which was expected to be  
366 mainly CD4-based. With additional data generated in two different *in vitro* T cell activation  
367 models (i.e., CD3/CD28 beads and PHA), we confirmed that CADA significantly inhibits the  
368 proliferation response of stimulated lymphocytes. Although the activation signals in T cells in  
369 these models are weakened but not completely blocked by CADA, this partial and temporal  
370 suppressive effect of CADA is certainly meaningful. Notably, the supra physiological  
371 stimulation of T cells with both CD3/CD28 beads and PHA is a condition that is never achieved  
372 in a normal *in vivo* setting where only a small subset of T cells is selectively triggered.

373 When comparing the active dose ranges of CADA with Clenoliximab in the MLR, we concluded  
374 that CADA was more potent than Clenoliximab at down-modulating hCD4 expression and at  
375 inhibiting lymphocyte proliferation. Clenoliximab is a nondepleting anti-CD4 monoclonal  
376 antibody that directly targets the hCD4 receptor (Hepburn et al., 2003). This antibody reached  
377 phase II clinical trial for the treatment of rheumatoid arthritis (Mould et al., 1999). The



378 concentrations of Clenoliximab used in our study were considered adequate to obtain  
379 maximum activity, as previously an IC<sub>50</sub> of 14.6 ng/ml Clenoliximab was reported in the MLR  
380 (Reddy et al., 2000). However, in our hands Clenoliximab exerted only a partial  
381 immunosuppressive effect, but this may be due to different assay characteristics (Reddy *et al.*  
382 used a three-way MLR, whereas we performed a one-way MLR). Either way, the data  
383 presented here indicate that the immunosuppressive capacity of CADA in the MLR exceeded  
384 that of Clenoliximab. Remarkably, at concentrations of 50, 10 and 2 µM of CADA similar down-  
385 modulation of hCD4 was elicited, whereas the inhibitory effect of CADA on lymphocyte  
386 proliferation still increased with higher concentrations (**Figure 2**). This suggested that besides  
387 reduction in CD4 expression, other factors may be at play in the total immunosuppressive  
388 effect of CADA.

389 Interestingly, CADA inhibited the proliferation of purified CD8<sup>+</sup> T cells to the same extent in the  
390 absence of other immune cell types as compared to the proliferation of total PBMCs in the  
391 MLR. In addition, the proliferation of purified CD8<sup>+</sup> T cells by stimulation with CD3/CD28 beads  
392 or PHA was also clearly suppressed by CADA treatment. Moreover, CADA inhibited cytotoxic  
393 cell activity in a cell-mediated lympholysis assay. These data demonstrate a direct inhibitory  
394 effect of CADA on CD8<sup>+</sup> T cell proliferation and function, independently of CD4 receptor  
395 expression. This effect cannot solely be attributed to reduced CD8 receptor levels measured  
396 in the cytotoxic T cells, as CADA suppressed CD8 levels only partially. Similar to the function  
397 of CD4 on CD4<sup>+</sup> T cells, the CD8 receptor enhances the sensitivity of CD8<sup>+</sup> T cells to antigens  
398 and is required for the formation of a stable complex between major histocompatibility complex  
399 class I and the T cell receptor (Xiao et al., 2007). However, the nearly complete inhibition of  
400 4-1BB upregulation in CD8<sup>+</sup> cells is most likely one of the main reasons for the strong non-CD4  
401 dependent immunosuppression of CADA in the CD8<sup>+</sup> T cell population. Indeed, a clear role of  
402 4-1BB in augmenting T cell cytotoxicity and CD8<sup>+</sup> T cell survival has been reported in literature  
403 (Kwon et al., 2000; Shuford et al., 1997; Vinay et al., 1998). The surface glycoprotein 4-1BB is  
404 a member of the TNFR family whose expression is highly induced in CD8<sup>+</sup> T and NK  
405 lymphocytes upon activation via CD3-TCR engagement. It functions as an inducible co-

406 stimulatory molecule that can exert regulatory effects on T cells mediating activation and  
407 persistence of cytotoxic T lymphocytes independently of CD28 stimulation (Cannons et al.,  
408 2001; Kwon et al., 1989; Lin et al., 2008; Melero et al., 1998; Shuford et al., 1997; Wang et al.,  
409 2003). The finding that 4-1BB-mediated co-stimulation is critical for CD8<sup>+</sup> T cell responses is  
410 further underlined in 4-1BB deficient mice in which decreased IFN- $\gamma$  production and cytolytic  
411 CD8<sup>+</sup> T cell effector function were observed (Kwon et al., 2002). In addition, 4-1BB deficiency  
412 in patients resulted in defective CD8<sup>+</sup> T cell activation and cytotoxicity against virus-infected B  
413 cells (Alosaimi et al., 2019).

414 From our molecular biology data, we concluded that 4-1BB is an additional substrate of CADA  
415 in the context of co-translational protein translocation inhibition across the ER membrane  
416 during early protein biogenesis. This process involves the SP of the pre-protein for inserting  
417 into the translocon channel of the ER and correct routing along the secretory pathway (Hegde  
418 et al., 2008; Rapoport, 2007; von Heijne, 1985; Wickner et al., 2005). Although originally  
419 assumed that hCD4 was the sole target of CADA (Vermeire et al., 2014), a recent proteomic  
420 study indicated sortilin as a secondary substrate of CADA but with reduced sensitivity to the  
421 drug (Van Puyenbroeck et al., 2017). In an additional proteomics analysis of SUP-T1 cells  
422 (which is still ongoing), only a few hits out of more than 3000 quantified integral membrane  
423 proteins could be identified as susceptible to CADA but all with weaker sensitivity as compared  
424 to hCD4. Also in our current study it is clear that CADA has not a general inhibitory effect on  
425 protein translocation of the total integral membrane fraction as evidenced by CD25 and CD69  
426 whose expression in transfected cells was unaffected by CADA. From our comparative  
427 analysis in transfected cells we can now conclude that 4-1BB is the most sensitive substrate  
428 of CADA identified so far, making it an ideal target for further mechanistic studies. By  
429 comparison with hCD4 we hope to get a better understanding of how a small molecule can  
430 exert such a high substrate selectivity for ER translocation inhibition in order to ultimately  
431 design novel ER translocation inhibitors for therapeutic use.

432 The upregulation of several immunologically relevant receptors after T cell stimulation was  
433 shown to be suppressed by CADA. To distinguish between reduced expression level because

434 of a general immunosuppression by CADA and a direct inhibition of protein translocation and  
435 subsequent receptor expression, we evaluated the expression efficiency of each receptor  
436 independently in transfected cells. Unaffected by CADA directly, the expression of late  
437 activation marker CD25 – also known as IL-2 receptor  $\alpha$ -chain – was significantly reduced and  
438 somewhat delayed by CADA after activation with CD3/CD28 beads and PHA. Thus, the CD25  
439 expression level in CADA-exposed activated T cells is a relevant measurement of the degree  
440 of actual T cell activation. This can also explain the higher variation in CD25 expression level  
441 between the different CADA-treated donors (*Figure 6A*) as compared to hCD4 (*Figure 4A*).  
442 Expectedly, we also observed a decreased amount of sCD25 in the supernatant of activated  
443 lymphocytes. sCD25 is a sensitive marker for activation of the immune system and it can also  
444 be used as a potential marker for subclinical macrophage activation syndrome in patients with  
445 active systemic onset juvenile idiopathic arthritis (Reddy et al., 2014). CD25 expression is  
446 massively upregulated after T cell activation involving T cell receptor and IL-2 receptor  
447 signaling pathways (Shatrova et al., 2016). In the IL-2 receptor signaling pathway, activation  
448 of STAT5 by phosphorylation is crucial to enhance CD25 expression. Furthermore, cytidine  
449 triphosphate synthase 1 (CTPS1) transcription is induced by activated STAT5, and as an  
450 enzyme in the *de novo* synthesis of cytidine triphosphate, CTPS1 is crucial for proliferation of  
451 activated T and B cells (Martin et al., 2014). Its expression is rapidly and strongly upregulated  
452 following T cell activation. CTPS1 plays a predominant role in selected immune cell populations  
453 – e.g. CTPS1-deficient patients present with a life-threatening immunodeficiency – making  
454 CTPS1 an interesting target for the development of highly selective immunomodulatory drugs.  
455 CADA-treatment not only resulted in reduced CD25 and pSTAT5 levels, but also in reduced  
456 down-stream CTPS1 expression. Together with the suppressed release of pro-inflammatory  
457 cytokines, these data support our conclusion of CADA's immunosuppressive potential.  
458 A major co-stimulatory receptor in T cell activation is CD28. Treatment of the cells with CADA  
459 clearly inhibited the upregulation of CD28. This was partially the result of direct CADA-inhibition  
460 on CD28 protein expression. The inhibitory effect of CADA on CD28 was not complete, as  
461 evident from the residual expression (about 50%) in activated cells, but certainly meaningful.

462 Blocking CD28 has been shown to be successful in inhibiting unwanted T cell responses and  
463 the use of CADA would circumvent the risk of generating an agonistic signal, as is potentially  
464 the case for anti-CD28 monoclonal antibodies (Beyersdorf et al., 2015). Also, as 4-1BB is able  
465 to replace CD28 in stimulating high-level IL-2 production by resting T cells in the absence of  
466 CD28 (Chu et al., 1997; DeBenedette et al., 1997; Saoulli et al., 1998), the combined inhibition  
467 of signaling through CD28 and 4-1BB by CADA provides an interesting additional effect. Both  
468 co-stimulatory factors have sequentially differential roles in the stages of immune response  
469 with CD28 involved in the induction stage and 4-1BB in perpetuating the immune response  
470 providing a survival signal for T cells (Hurtado et al., 1997; Kwon et al., 2000; Takahashi et al.,  
471 1999).

472 In this study, 4-1BB has been discovered as a new target of CADA. Recently, the role of 4-1BB  
473 agonistic signaling in cancer immunotherapy has received great attention: the effect of 4-1BB  
474 stimulation by means of agonistic monoclonal anti-4-1BB antibodies on cytolytic T-cell  
475 responses has been used to increase the potency of vaccines against cancers (Bartkowiak et  
476 al., 2015; Chester et al., 2016; Oda et al., 2020). Therapeutic use of CADA would imply  
477 depletion of 4-1BB in order to attenuate cytotoxic T cell activity. In this context, blockade of  
478 4-1BB has been shown to significantly impair the priming of alloantigen-specific CD8<sup>+</sup> T cells  
479 and to increase allograft survival after transplantation (Cho et al., 2004; Wang et al., 2003),  
480 thus, suggesting a valuable application for CADA as new immunosuppressive drug in the field  
481 of e.g., organ transplantation. Furthermore, in the more general context of inflammatory  
482 diseases with a role of the adaptive immunity, general immunosuppression by CADA might be  
483 relevant to control, for instance, cytokine storm in hemophagocytic lymphohistiocytosis (HLH),  
484 severe cytokine release syndrome (CRS) in CAR T cell treatment, or even auto-immune  
485 diseases. As mainly human targets have been identified for CADA and resistance has been  
486 observed for e.g., murine CD4, humanized *in vivo* animal models are needed to fully evaluate  
487 CADA's potential in these fields.

488 In conclusion (**Figure 11**), we showed here that the ER translocation inhibitor CADA exerted  
489 a profound and consistent *in vitro* immunosuppressive effect in the MLR and after activation

490 with CD3/CD28 beads or PHA. This immunosuppressive effect of CADA involves both CD4<sup>+</sup>  
491 and CD8<sup>+</sup> T cells, but is most prominent in the CD8<sup>+</sup> T cell subpopulation where it inhibits cell-  
492 mediated lympholysis. Next to the full suppression of CD4 and 4-1BB receptor upregulation,  
493 the combined effect of CADA on additional co-stimulatory factors such as CD28, OX40 and  
494 CD8 characterize the total immunosuppressive potential of CADA. Taken together, our data  
495 justify future *in vivo* exploration of this compound to evaluate its potential use to repress  
496 undesired immune activation.

## 497 **MATERIAL AND METHODS**

498

### 499 ***Compounds and antibodies***

500 CADA was a gift from Dr. Thomas W. Bell (University of Nevada, Reno). It was synthesized as  
501 described previously (Bell et al., 2006). Mycophenolate mofetil (MMF) was obtained from  
502 Sigma-Aldrich. Both compounds were dissolved in dimethyl sulfoxide (DMSO) to obtain a 10  
503 mM stock solution for use in cell culture. The anti-CD4 monoclonal antibody Clenoliximab  
504 (chimeric macaque/human IgG4 antibody) was purchased from Absolute Antibody. Flow  
505 cytometry antibodies were purchased from (i) eBioscience (Thermo Fisher Scientific): APC-  
506 labeled anti-mouse CD4 (clone GK1.5) and APC-labeled anti-human phospho-STAT5  
507 (Tyr694) (clone SRBCZX); (ii) BioLegend: PE-labeled anti-human CD4 (clone SK3), PE-  
508 labeled anti-human CD4 (clone OKT4), APC-labeled anti-human CD4 (clone SK3) and PE-  
509 labeled anti-human CD69 (clone FN50); (iii) BD Biosciences: BV510-labeled anti-human CD8  
510 (clone SK1), PE-labeled anti-human CD25 (clone 2A3), FITC-labeled anti-human CD25 (clone  
511 2A3), PE-labeled anti-human CD28 (clone CD28.2), BV421-labeled anti-human GITR (clone  
512 V27-580), PE-labeled anti-human OX40 (clone ACT35), PE-labeled anti-human 4-1BB (clone  
513 4B4-1) and BD Horizon Fixable Viability Stain 780. Western blot antibodies were purchased  
514 from (i) abcam: anti-human CTPS1 (clone EPR8086(B)); (ii) BD Biosciences: anti-human  
515 clathrin (clone 23/Clathrin Heavy Chain); (iii) Dako: HRP-labeled goat anti-mouse and swine  
516 anti-rabbit immunoglobulins.

517

### 518 ***Cell culture and isolation***

519 Cell lines were obtained from the American Type Culture Collection and were maintained at  
520 37°C with 5% CO<sub>2</sub>. Jurkat, RPMI1788 and Raji-GFP cells were cultured in Roswell Park  
521 Memorial Institute 1640 medium (Gibco, Thermo Fisher Scientific) supplemented with 10%  
522 fetal bovine serum (FBS, Biowest) and 2 mM L-glutamine (Gibco, Thermo Fisher Scientific).  
523 HEK293T cells were cultured in Dulbecco's Modified Eagle Medium (Gibco, Thermo Fisher  
524 Scientific) supplemented with 10% FBS (Biowest) and 1% HEPES (Gibco, Thermo Fisher

525 Scientific). Peripheral blood mononuclear cells (PBMCs) were isolated from buffy coats (Red  
526 Cross Belgium) by density gradient centrifugation using Lymphoprep (Alere Technologies AS)  
527 and HetaSep (STEMCELL Technologies) to remove red blood cells. Naive CD4<sup>+</sup> T cells were  
528 isolated by negative selection with the EasySep Human Naïve CD4<sup>+</sup> T Cell Isolation Kit  
529 (STEMCELL Technologies) according to manufacturer's protocol. CD4<sup>+</sup> and CD8<sup>+</sup> T cells were  
530 isolated by negative selection with the Dynabeads Untouched Human CD4 T Cells Kit and the  
531 Dynabeads Untouched Human CD8 T Cells Kit (Invitrogen, Thermo Fisher Scientific)  
532 respectively, according to manufacturer's protocol.

533

### 534 ***Plasmids***

535 The pcDNA3.1-hCD4-tGFP-P2A-mCherry construct was cloned by assembly of PCR  
536 fragments (New England BioLabs) from the pcDNA3.1 expression vector (Invitrogen, Thermo  
537 Fisher Scientific) encoding wild-type hCD4 which was kindly provided by Dr. O. Schwartz  
538 (Institut Pasteur, Paris), and the pEGFP-N1 vector (Clontech) containing EGFP-P2A-mCherry,  
539 kindly provided by Dr. R. Hegde (MRC, Cambridge). The pcDNA3.1-mCD4 expression vector  
540 was generated by cloning full-length mCD4 from a pReceiver-M16 vector, containing mouse  
541 CD4-eYFP (GeneCopoeia), into a pcDNA3.1 tGFP-P2A-mCherry vector. The pcDNA3.1-  
542 hmCD4-tGFP-P2A-mCherry expression vector was generated by cloning a synthesized  
543 gBlock-fragment (IDT) encoding the hCD4-mCD4 sequence into a pcDNA3.1 tGFP-P2A-  
544 mCherry vector (Invitrogen, Thermo Fisher Scientific). The other pcDNA3.1-tGFP-P2A-  
545 mCherry reporter constructs were cloned by assembly of PCR fragments (New England  
546 BioLabs) from different sources: the CD8 $\alpha$  reporter construct was generated from a pORF-  
547 hCD8 $\alpha$  vector purchased from InvivoGen, while the CD25, CD28, CD69, OX40 and 4-1BB  
548 reporter constructs were cloned from vectors purchased from Sino Biological. Sequences were  
549 confirmed by automated capillary Sanger sequencing (Macrogen Europe).

550

### 551 ***Cell transfection***



552 HEK293T cells were plated at  $5 \times 10^5$  cells/mL in Corning Costar 6-well plates and were  
553 transfected with the tGFP-P2A-mCherry constructs 24h after plating. Transfections were done  
554 by making use of Lipofectamine 2000 transfection reagent (Invitrogen, Thermo Fisher  
555 Scientific). Six hours after transfection, indicated amounts of CADA or 0.1% of DMSO were  
556 added. Cells were collected for flow cytometric analysis 24h after transfection.

557

### 558 ***Cell viability analysis***

559 Jurkat cells were plated at  $1 \times 10^5$  cells/mL in Corning Costar 24-well plates in the presence of  
560 indicated amounts of CADA or MMF. After 48h, cells were stained with trypan blue and counted  
561 with a Vi-CELL cell counter (Beckman Coulter).

562

### 563 ***MTS-PES assay***

564 Jurkat cells were plated at  $2.5 \times 10^5$  cells/mL in Falcon flat-bottom 96-well plates in the  
565 presence of indicated amounts of CADA or MMF, or in the presence of corresponding DMSO  
566 concentrations. MTS-PES (Promega) was added 48h later and after a 2h incubation period,  
567 colorimetric detection was done using the VersaMax microplate reader (Molecular Devices).

568

### 569 ***T cell activation by superantigens***

570 Jurkat or naive CD4<sup>+</sup> T cells were plated at  $2.8 \times 10^5$  cells/mL in Falcon round-bottom 96-well  
571 plates in presence or absence of 10  $\mu$ M of CADA. After 48h, T cells were activated by adding  
572 Staphylococcal enterotoxin E (Toxin Technology) or Staphylococcal enterotoxin B (Sigma-  
573 Aldrich)-stimulated Raji-GFP cells at a concentration of  $1.2 \times 10^6$  cells/mL. Raji cells were  
574 labeled with GFP to distinguish them from Jurkat and naive CD4<sup>+</sup> T cells by flow cytometry.  
575 Expression of the early activation marker CD69 was detected by flow cytometry 24h later.

576

### 577 ***Mixed lymphocyte reaction***

578 PBMCs ( $1.2 \times 10^6$  cells/mL) were co-incubated with mitomycin C (Sigma-Aldrich)-inactivated  
579 RPMI1788 cells ( $0.45 \times 10^6$  cells/mL) in Falcon flat-bottom 96-well plates in the presence of

580 indicated amounts of compounds or antibody and corresponding concentrations of DMSO. At  
581 day 5, 0.001 mCi of [<sup>3</sup>H]-thymidine (PerkinElmer) was added per well and 18h later, cells were  
582 harvested on Unifilter-96 GF/C plates (PerkinElmer) with the Unifilter-96 Cell Harvester  
583 (PerkinElmer). 20 µL of MicroScint-20 (PerkinElmer) was added per filter and counts per  
584 minute (cpm) were detected with the MicroBeta device (PerkinElmer). Expression of hCD4 was  
585 measured at day 5 by flow cytometry.

586

### 587 ***Cell-mediated lympholysis***

588 PBMCs ( $4.8 \times 10^6$  cells/mL) were co-incubated with mitomycin C (Sigma-Aldrich)-inactivated  
589 RPMI1788 stimulator cells ( $1.8 \times 10^6$  cells/mL) in Falcon round-bottom 14 mL tubes in presence  
590 or absence of CADA for 6 days. After this incubation period, PBMCs were collected and  
591 concentrated at  $5 \times 10^6$  cells/mL. Fresh target RPMI1788 cells were labeled with <sup>51</sup>Cr (MP  
592 Biomedicals), followed by a 4h incubation at 37°C with the PBMCs in a ratio of 50/1 (500,000  
593 effector cells/10,000 target cells per well). To measure spontaneous and maximum release of  
594 <sup>51</sup>Cr, medium or saponin was added to the <sup>51</sup>Cr-labeled RPMI1788 cells, respectively. After  
595 incubation, supernatant was collected and <sup>51</sup>Cr release was detected using a TopCount  
596 gamma counter (Packard Instrument Company). The percentage of specific lysis was  
597 calculated by the following formula: % specific lysis = (experimental release – spontaneous  
598 release) / (maximum release – spontaneous release) x 100.

599

### 600 ***T cell activation by CD3/CD28 beads or phytohemagglutinin***

601 PBMCs were pre-incubated at a concentration of  $4 \times 10^5$  cells/mL with 10 µM of CADA or 0.1%  
602 DMSO during 3 days in Falcon flat-bottom 96-well plates. T cells were activated with  
603 Dynabeads Human T-Activator CD3/CD28 (beads/cell ratio of 1/2; Gibco, Thermo Fisher  
604 Scientific) or with 4.5 µg/mL phytohemagglutinin (PHA; Sigma-Aldrich) and further incubated  
605 with 10 µM of CADA or 0.1% DMSO. At 4h, 1 day, 2 days, 3 days or 4 days after activation,  
606 0.001 mCi of [<sup>3</sup>H]-thymidine (PerkinElmer) was added per well and 22h later, cells were  
607 harvested on Unifilter-96 GF/C plates (PerkinElmer) with the Unifilter-96 Cell Harvester

608 (PerkinElmer). 20  $\mu$ L of MicroScint-20 (PerkinElmer) was added per filter and cpm were  
609 detected with the MicroBeta device (PerkinElmer). Expression of CD4, CD8, CD25 and CD28  
610 was measured by flow cytometry just before activation (0h) and 4h, 1 day, 2 days, 3 days or 4  
611 days after activation. Expression of OX40 and 4-1BB was measured by flow cytometry 2 days  
612 after activation. Intracellular levels of phosphorylated signal transducer and activator of  
613 transcription 5 (pSTAT5) were measured by flow cytometry 2 days after activation with or  
614 without an extra stimulation with 25 ng/mL IL-2 (R&D Systems) during 15 min.

615

### 616 ***Flow cytometry***

617 Cells were collected and washed in PBS (Gibco, Thermo Fisher Scientific) supplemented with  
618 2% FBS (Biowest). Antibodies were diluted in PBS with 2% FBS and samples were stored in  
619 PBS containing 1% formaldehyde (VWR Life Science AMRESCO). For intracellular staining,  
620 samples were immediately fixed in PBS with 2% formaldehyde, after which cells were  
621 permeabilized using absolute methanol (Biosolve) and stained with antibody. Acquisition of all  
622 samples was done on a BD FACSCanto II flow cytometer (BD Biosciences) with BD FACSDiva  
623 v8.0.1 software, except for the samples of the tGFP-P2A-mCherry constructs, that were  
624 acquired on a BD LSRFortessa flow cytometer (BD Biosciences) with BD FACSDiva v8.0.2  
625 software. Flow cytometric data were analyzed in FlowJo v10.1.

626

### 627 ***ELISA and Bio-Plex assay***

628 For detection of soluble CD25 (sCD25), supernatants were collected at 2 days, 3 days or 4  
629 days after activation with CD3/CD28 beads or PHA. The concentration of sCD25 was  
630 measured with the Human CD25/IL-2R alpha Quantikine ELISA kit (R&D Systems) according  
631 to manufacturer's protocol. Detection was done using a SpectraMax Microplate Reader  
632 (Molecular Devices). For the quantification of the cytokines IL-2, IFN- $\gamma$  and TNF- $\alpha$  Cytokine  
633 Human ProcartaPlex Panel kits (Invitrogen, Thermo Fisher Scientific) were used following  
634 manufacturer's protocol. Supernatant was taken at day 5 post stimulation for the MLR samples

635 and at day 3 for the CD3/CD28 beads- and PHA-activated samples. Detection was done with  
636 the Bio-Plex 200 System (Bio-Rad).

637

### 638 ***Western blot***

639 PBMCs were lysed in ice-cold Nonidet P-40 buffer (50 mM Tris-HCl (pH 8.0), 150 mM NaCl,  
640 1% Nonidet P-40) supplemented with 100x cOmplete Protease Inhibitor Cocktail (Roche,  
641 Sigma-Aldrich) and 250x PMSF Protease Inhibitor (100 mM in dry isopropanol, Thermo Fisher  
642 Scientific) and centrifuged at 17,000xg during 10 min. Samples were boiled in reducing 2x  
643 Laemmli sample buffer (120 mM Tris-HCl (pH 6.8), 4% sodium dodecyl sulphate, 20% glycerol,  
644 100 mM dithiothreitol, 0.02% bromophenol blue) and were separated on 4-12% Criterion XT  
645 Bis-Tris Precast gels (Bio-Rad) using 1x MES buffer (Bio-Rad). After electrophoresis, gels  
646 were blotted onto polyvinylidene difluoride membranes with the Trans-Blot Turbo Transfer  
647 System (Bio-Rad). Membranes were blocked during 1h with 5% nonfat dried milk in tris-  
648 buffered saline with Tween 20 (20 mM Tris-HCl (pH 7.6), 137 mM NaCl, 0.05% Tween 20) and  
649 incubated overnight with the primary antibodies at 4°C. The next day, membranes were  
650 washed and incubated with the secondary antibodies. Detection was done with a ChemiDoc  
651 MP Imaging System (Bio-Rad) using the SuperSignal West Femto Maximum Sensitivity  
652 Substrate (Pierce, Thermo Fisher Scientific). Clathrin was used as a control for protein  
653 concentration.

654

### 655 ***Cell-free in vitro translation and translocation***

656 The Qiagen EasyXpress linear template kit was used to generate full length cDNAs using PCR.  
657 PCR products were purified and transcribed *in vitro* using T7 RNA polymerase (RiboMAX  
658 system, Promega). All transcripts were translated in rabbit reticulocyte lysate (Promega) in the  
659 presence of L-35S-methionine (Perkin Elmer). Translations were performed at 30°C in the  
660 presence or absence of ovine pancreatic microsomes and CADA as described elsewhere  
661 (Vermeire et al., 2015). Samples were washed with low-salt buffer (80 mM KOAc, 2 mM  
662 Mg(OAc)<sub>2</sub>, 50 mM HEPES pH 7.6) and radiolabeled proteins were isolated by centrifugation

663 for 10 minutes at 21,382×g and 4°C (Hettich 200R centrifuge with 2424-B rotor). The proteins  
664 were then separated with SDS-PAGE and detected by phosphor imaging (Cyclone Plus  
665 storage phosphor system, Perkin Elmer).

666

### 667 ***Statistical analysis***

668 Data were visualized as means ± standard deviation (SD) or as absolute individual data points  
669 and were analyzed by making use of the GraphPad Prism v7.0 software. Data were analyzed  
670 with multiple t-tests to compare different treatment concentrations to the corresponding control  
671 or to compare CADA to DMSO in several stimulation conditions. In case of multiple testing, a  
672 Holm-Sidak method was used to correct for multiple comparison. Paired t-tests were used for  
673 the comparison of CADA and DMSO for proliferation response, receptor expression and levels  
674 of sCD25 at certain time points. P-values bellow 0.05 were considered statistically significant.

675 **ACKNOWLEDGEMENTS**

676 We thank Anita Camps, Sandra Claes, Eric Fonteyn, Becky Provinciael, Omer Rutgeerts,  
677 Geert Schoofs and Joren Stroobants for their excellent technical assistance. Dr. Thomas W.  
678 Bell (UNR, Nevada, USA) is acknowledged for providing CADA compound. We are grateful to  
679 Prof. Enno Hartmann and Prof. Kai-Uwe Kalies for providing microsomal membranes.  
680 This work was partly supported by the KU Leuven grant no. PF/10/018. BS is a senior clinical  
681 investigator of the Research Foundation Flanders (FWO) (1842919N).

682

683 **AUTHOR CONTRIBUTIONS**

684 K.V., E.C., B.S. and S.H.-B. conceived experiments; E.C. and E.P. performed experiments;  
685 K.V., E.C. and B.S. wrote the manuscript; D.S. secured funding; S.H.-B. and D.S. provided  
686 reagents; M.W., B.S. and S.H.-B. provided expertise and feedback.

687

688 **DECLARATION OF INTERESTS**

689 The authors declare no competing interests.

690 **REFERENCES**

- 691 Alosaimi MF, Hoenig M, Jaber F, Platt CD, Jones J, Wallace J, Debatin KM, Schulz A,  
692 Jacobsen E, Moller P, Shamseldin HE, Abdulwahab F, Ibrahim N, Alardati H, Almuhi  
693 F, Abosoudah IF, Basha TA, Chou J, Alkuraya FS, Geha RS. 2019. Immunodeficiency  
694 and EBV-induced lymphoproliferation caused by 4-1BB deficiency. *J Allergy Clin*  
695 *Immunol* **144**:574-583 e575. DOI:10.1016/j.jaci.2019.03.002
- 696 Bartkowiak T, Curran MA. 2015. 4-1BB Agonists: Multi-Potent Potentiators of Tumor Immunity.  
697 *Front Oncol* **5**:117. DOI:10.3389/fonc.2015.00117
- 698 Bell TW, Anugu S, Bailey P, Catalano VJ, Dey K, Drew MG, Duffy NH, Jin Q, Samala MF,  
699 Sodoma A, Welch WH, Schols D, Vermeire K. 2006. Synthesis and structure-activity  
700 relationship studies of CD4 down-modulating cyclotriazadisulfonamide (CADA)  
701 analogues. *J Med Chem* **49**:1291-1312. DOI:10.1021/jm0582524
- 702 Bernstein HB, Plasterer MC, Schiff SE, Kitchen CM, Kitchen S, Zack JA. 2006. CD4 expression  
703 on activated NK cells: ligation of CD4 induces cytokine expression and cell migration.  
704 *J Immunol* **177**:3669-3676. DOI:10.4049/jimmunol.177.6.3669
- 705 Beyersdorf N, Kerkau T, Hunig T. 2015. CD28 co-stimulation in T-cell homeostasis: a recent  
706 perspective. *ImmunoTargets and therapy* **4**:111-122. DOI:10.2147/itt.s61647
- 707 Bialecki E, Macho Fernandez E, Ivanov S, Paget C, Fontaine J, Rodriguez F, Lebeau L, Ehret  
708 C, Frisch B, Trottein F, Faveeuw C. 2011. Spleen-resident CD4+ and CD4- CD8alpha-  
709 dendritic cell subsets differ in their ability to prime invariant natural killer T lymphocytes.  
710 *PLoS One* **6**:e26919. DOI:10.1371/journal.pone.0026919
- 711 Cannons JL, Lau P, Ghumman B, DeBenedette MA, Yagita H, Okumura K, Watts TH. 2001.  
712 4-1BB ligand induces cell division, sustains survival, and enhances effector function of  
713 CD4 and CD8 T cells with similar efficacy. *J Immunol* **167**:1313-1324.  
714 DOI:10.4049/jimmunol.167.3.1313
- 715 Chester C, Ambulkar S, Kohrt HE. 2016. 4-1BB agonism: adding the accelerator to cancer  
716 immunotherapy. *Cancer Immunol Immunother* **65**:1243-1248. DOI:10.1007/s00262-  
717 016-1829-2



- 718 Cho HR, Kwon B, Yagita H, La S, Lee EA, Kim JE, Akiba H, Kim J, Suh JH, Vinay DS, Ju SA,  
719 Kim BS, Mittler RS, Okumura K, Kwon BS. 2004. Blockade of 4-1BB (CD137)/4-1BB  
720 ligand interactions increases allograft survival. *Transplant international : official journal*  
721 *of the European Society for Organ Transplantation* **17**:351-361. DOI:10.1007/s00147-  
722 004-0726-3
- 723 Chu NR, DeBenedette MA, Stiernholm BJ, Barber BH, Watts TH. 1997. Role of IL-12 and 4-  
724 1BB ligand in cytokine production by CD28+ and CD28- T cells. *J Immunol* **158**:3081-  
725 3089.
- 726 Claeys E, Vermeire K. 2019. The CD4 receptor: An indispensable protein in T cell activation  
727 and a promising target for immunosuppression. *Arch Microbiol Immunology* **3**:133-150.
- 728 Collman R, Godfrey B, Cutilli J, Rhodes A, Hassan NF, Sweet R, Douglas SD, Friedman H,  
729 Nathanson N, Gonzalez-Scarano F. 1990. Macrophage-tropic strains of human  
730 immunodeficiency virus type 1 utilize the CD4 receptor. *J Virol* **64**:4468-4476.
- 731 Cruikshank WW, Greenstein JL, Theodore AC, Center DM. 1991. Lymphocyte  
732 chemoattractant factor induces CD4-dependent intracytoplasmic signaling in  
733 lymphocytes. *J Immunol* **146**:2928-2934.
- 734 Dalgleish AG, Beverley PC, Clapham PR, Crawford DH, Greaves MF, Weiss RA. 1984. The  
735 CD4 (T4) antigen is an essential component of the receptor for the AIDS retrovirus.  
736 *Nature* **312**:763-767. DOI:10.1038/312763a0
- 737 DeBenedette MA, Shahinian A, Mak TW, Watts TH. 1997. Costimulation of CD28- T  
738 lymphocytes by 4-1BB ligand. *J Immunol* **158**:551-559.
- 739 Fowell DJ, Magram J, Turck CW, Killeen N, Locksley RM. 1997. Impaired Th2 subset  
740 development in the absence of CD4. *Immunity* **6**:559-569.
- 741 Hegde RS, Kang SW. 2008. The concept of translocational regulation. *J Cell Biol* **182**:225-  
742 232. DOI:10.1083/jcb.200804157
- 743 Hepburn TW, Totoritis MC, Davis CB. 2003. Antibody-mediated stripping of CD4 from  
744 lymphocyte cell surface in patients with rheumatoid arthritis. *Rheumatology (Oxford,*  
745 *England)* **42**:54-61. DOI:10.1093/rheumatology/keg030

- 746 Hurtado JC, Kim YJ, Kwon BS. 1997. Signals through 4-1BB are costimulatory to previously  
747 activated splenic T cells and inhibit activation-induced cell death. *Journal of*  
748 *Immunology* **158**:2600-2609.
- 749 Janeway CA, Jr. 1989. The role of CD4 in T-cell activation: accessory molecule or co-receptor?  
750 *Immunology today* **10**:234-238. DOI:10.1016/0167-5699(89)90260-0
- 751 Killeen N, Davis CB, Chu K, Crooks ME, Sawada S, Scarborough JD, Boyd KA, Stuart SG, Xu  
752 H, Littman DR. 1993. CD4 function in thymocyte differentiation and T cell activation.  
753 *Philosophical transactions of the Royal Society of London. Series B, Biological*  
754 *sciences* **342**:25-34. DOI:10.1098/rstb.1993.0131
- 755 Klatzmann D, Champagne E, Chamaret S, Gruest J, Guetard D, Hercend T, Gluckman JC,  
756 Montagnier L. 1984. T-lymphocyte T4 molecule behaves as the receptor for human  
757 retrovirus LAV. *Nature* **312**:767-768. DOI:10.1038/312767a0
- 758 Konig R, Zhou W. 2004. Signal transduction in T helper cells: CD4 coreceptors exert complex  
759 regulatory effects on T cell activation and function. *Current issues in molecular biology*  
760 **6**:1-15.
- 761 Krogsgaard M, Li QJ, Sumen C, Huppa JB, Huse M, Davis MM. 2005. Agonist/endogenous  
762 peptide-MHC heterodimers drive T cell activation and sensitivity. *Nature* **434**:238-243.  
763 DOI:10.1038/nature03391
- 764 Kwon B, Moon CH, Kang S, Seo SK, Kwon BS. 2000. 4-1BB: still in the midst of darkness. *Mol*  
765 *Cells* **10**:119-126. DOI:10.1007/s10059-000-0119-0
- 766 Kwon BS, Hurtado JC, Lee ZH, Kwack KB, Seo SK, Choi BK, Koller BH, Wolisi G, Broxmeyer  
767 HE, Vinay DS. 2002. Immune responses in 4-1BB (CD137)-deficient mice. *J Immunol*  
768 **168**:5483-5490. DOI:10.4049/jimmunol.168.11.5483
- 769 Kwon BS, Weissman SM. 1989. cDNA sequences of two inducible T-cell genes. *Proc Natl*  
770 *Acad Sci U S A* **86**:1963-1967. DOI:10.1073/pnas.86.6.1963
- 771 Lane P. 2000. Role of OX40 signals in coordinating CD4 T cell selection, migration, and  
772 cytokine differentiation in T helper (Th)1 and Th2 cells. *J Exp Med* **191**:201-206.  
773 DOI:10.1084/jem.191.2.201

- 774 Lin W, Voskens CJ, Zhang X, Schindler DG, Wood A, Burch E, Wei Y, Chen L, Tian G, Tamada  
775 K, Wang LX, Schulze DH, Mann D, Strome SE. 2008. Fc-dependent expression of  
776 CD137 on human NK cells: insights into "agonistic" effects of anti-CD137 monoclonal  
777 antibodies. *Blood* **112**:699-707. DOI:10.1182/blood-2007-11-122465
- 778 Maddon PJ, Littman DR, Godfrey M, Maddon DE, Chess L, Axel R. 1985. The isolation and  
779 nucleotide sequence of a cDNA encoding the T cell surface protein T4: a new member  
780 of the immunoglobulin gene family. *Cell* **42**:93-104.
- 781 Marrack P, Kappler J. 1990. The staphylococcal enterotoxins and their relatives. *Science*  
782 **248**:705-711. DOI:10.1126/science.2185544
- 783 Martin E, Palmic N, Sanquer S, Lenoir C, Hauck F, Mongellaz C, Fabrega S, Nitschke P,  
784 Esposti MD, Schwartzentruber J, Taylor N, Majewski J, Jabado N, Wynn RF, Picard C,  
785 Fischer A, Arkwright PD, Latour S. 2014. CTP synthase 1 deficiency in humans reveals  
786 its central role in lymphocyte proliferation. *Nature* **510**:288-292.  
787 DOI:10.1038/nature13386
- 788 Mayer CT, Huntenburg J, Nandan A, Schmitt E, Czeloth N, Sparwasser T. 2013. CD4 blockade  
789 directly inhibits mouse and human CD4(+) T cell functions independent of Foxp3(+)  
790 Tregs. *J Autoimmun* **47**:73-82. DOI:10.1016/j.jaut.2013.08.008
- 791 Melero I, Bach N, Hellström KE, Aruffo A, Mittler RS, Chen L. 1998. Amplification of tumor  
792 immunity by gene transfer of the co-stimulatory 4-1BB ligand: synergy with the CD28  
793 co-stimulatory pathway. *European journal of immunology* **28**:1116-1121.  
794 DOI:10.1002/(sici)1521-4141(199803)28:03<1116::Aid-immu1116>3.0.Co;2-a
- 795 Mould DR, Davis CB, Minthorn EA, Kwok DC, Elliott MJ, Luggen ME, Totoritis MC. 1999. A  
796 population pharmacokinetic-pharmacodynamic analysis of single doses of clenoliximab  
797 in patients with rheumatoid arthritis. *Clinical pharmacology and therapeutics* **66**:246-  
798 257. DOI:10.1016/s0009-9236(99)70032-9
- 799 Oda SK, Anderson KG, Ravikumar P, Bonson P, Garcia NM, Jenkins CM, Zhuang S, Daman  
800 AW, Chiu EY, Bates BM, Greenberg PD. 2020. A Fas-4-1BB fusion protein converts a

- 801 death to a pro-survival signal and enhances T cell therapy. *J Exp Med* **217**.  
802 DOI:10.1084/jem.20191166
- 803 Pelchen-Matthews A, Boulet I, Littman DR, Fagard R, Marsh M. 1992. The protein tyrosine  
804 kinase p56lck inhibits CD4 endocytosis by preventing entry of CD4 into coated pits. *J*  
805 *Cell Biol* **117**:279-290. DOI:10.1083/jcb.117.2.279
- 806 Rahemtulla A, Fung-Leung WP, Schilham MW, Kundig TM, Sambhara SR, Narendran A,  
807 Arabian A, Wakeham A, Paige CJ, Zinkernagel RM, et al. 1991. Normal development  
808 and function of CD8+ cells but markedly decreased helper cell activity in mice lacking  
809 CD4. *Nature* **353**:180-184. DOI:10.1038/353180a0
- 810 Rapoport TA. 2007. Protein translocation across the eukaryotic endoplasmic reticulum and  
811 bacterial plasma membranes. *Nature* **450**:663-669. DOI:10.1038/nature06384
- 812 Reddy MP, Kinney CA, Chaikin MA, Payne A, Fishman-Lobell J, Tsui P, Dal Monte PR, Doyle  
813 ML, Brigham-Burke MR, Anderson D, Reff M, Newman R, Hanna N, Sweet RW, Truneh  
814 A. 2000. Elimination of Fc receptor-dependent effector functions of a modified IgG4  
815 monoclonal antibody to human CD4. *J Immunol* **164**:1925-1933.  
816 DOI:10.4049/jimmunol.164.4.1925
- 817 Reddy VV, Myles A, Cheekatla SS, Singh S, Aggarwal A. 2014. Soluble CD25 in serum: a  
818 potential marker for subclinical macrophage activation syndrome in patients with active  
819 systemic onset juvenile idiopathic arthritis. *International journal of rheumatic diseases*  
820 **17**:261-267. DOI:10.1111/1756-185x.12196
- 821 Saoulli K, Lee SY, Cannons JL, Yeh WC, Santana A, Goldstein MD, Bangia N, DeBenedette  
822 MA, Mak TW, Choi Y, Watts TH. 1998. CD28-independent, TRAF2-dependent  
823 costimulation of resting T cells by 4-1BB ligand. *J Exp Med* **187**:1849-1862.  
824 DOI:10.1084/jem.187.11.1849
- 825 Schulze-Koops H, Lipsky PE. 2000. Anti-CD4 monoclonal antibody therapy in human  
826 autoimmune diseases. *Current directions in autoimmunity* **2**:24-49.
- 827 Shatrova AN, Mityushova EV, Vassilieva IO, Aksenov ND, Zenin VV, Nikolsky NN, Marakhova,  
828 II. 2016. Time-Dependent Regulation of IL-2R alpha-Chain (CD25) Expression by TCR

- 829 Signal Strength and IL-2-Induced STAT5 Signaling in Activated Human Blood T  
830 Lymphocytes. *PLoS One* **11**:e0167215. DOI:10.1371/journal.pone.0167215
- 831 Shaw AS, Amrein KE, Hammond C, Stern DF, Sefton BM, Rose JK. 1989. The Ick tyrosine  
832 protein kinase interacts with the cytoplasmic tail of the CD4 glycoprotein through its  
833 unique amino-terminal domain. *Cell* **59**:627-636.
- 834 Shuford WW, Klussman K, Tritchler DD, Loo DT, Chalupny J, Siadak AW, Brown TJ, Emswiler  
835 J, Raecho H, Larsen CP, Pearson TC, Ledbetter JA, Aruffo A, Mittler RS. 1997. 4-1BB  
836 costimulatory signals preferentially induce CD8+ T cell proliferation and lead to the  
837 amplification in vivo of cytotoxic T cell responses. *J Exp Med* **186**:47-55.  
838 DOI:10.1084/jem.186.1.47
- 839 Takahashi C, Mittler RS, Vella AT. 1999. Cutting edge: 4-1BB is a bona fide CD8 T cell survival  
840 signal. *Journal of Immunology* **162**:5037-5040.
- 841 Van Puyenbroeck V, Claeys E, Schols D, Bell TW, Vermeire K. 2017. A Proteomic Survey  
842 Indicates Sortilin as a Secondary Substrate of the ER Translocation Inhibitor  
843 Cyclotriazadisulfonamide (CADA). *Mol Cell Proteomics* **16**:157-167.  
844 DOI:10.1074/mcp.M116.061051
- 845 Van Puyenbroeck V, Pauwels E, Provinciael B, Bell TW, Schols D, Kalies KU, Hartmann E,  
846 Vermeire K. 2020. Preprotein signature for full susceptibility to the co-translational  
847 translocation inhibitor cyclotriazadisulfonamide. *Traffic* **21**:250-264.  
848 DOI:10.1111/tra.12713
- 849 Vermeire K, Allan S, Provinciael B, Hartmann E, Kalies KU. 2015. Ribonuclease-neutralized  
850 pancreatic microsomal membranes from livestock for in vitro co-translational protein  
851 translocation. *Anal Biochem* **484**:102-104. DOI:10.1016/j.ab.2015.05.019
- 852 Vermeire K, Bell TW, Choi HJ, Jin Q, Samala MF, Sodoma A, De Clercq E, Schols D. 2003.  
853 The Anti-HIV potency of cyclotriazadisulfonamide analogs is directly correlated with  
854 their ability to down-modulate the CD4 receptor. *Mol Pharmacol* **63**:203-210.
- 855 Vermeire K, Bell TW, Van Puyenbroeck V, Giraut A, Noppen S, Liekens S, Schols D, Hartmann  
856 E, Kalies KU, Marsh M. 2014. Signal peptide-binding drug as a selective inhibitor of co-

- 857 translational protein translocation. *PLoS Biol* **12**:e1002011.  
858 DOI:10.1371/journal.pbio.1002011
- 859 Vermeire K, Lisco A, Grivel JC, Scarbrough E, Dey K, Duffy N, Margolis L, Bell TW, Schols D.  
860 2007. Design and cellular kinetics of dansyl-labeled CADA derivatives with anti-HIV  
861 and CD4 receptor down-modulating activity. *Biochem Pharmacol* **74**:566-578.  
862 DOI:10.1016/j.bcp.2007.05.018
- 863 Vermeire K, Zhang Y, Princen K, Hatse S, Samala MF, Dey K, Choi HJ, Ahn Y, Sodoma A,  
864 Snoeck R, Andrei G, De Clercq E, Bell TW, Schols D. 2002. CADA inhibits human  
865 immunodeficiency virus and human herpesvirus 7 replication by down-modulation of  
866 the cellular CD4 receptor. *Virology* **302**:342-353.
- 867 Vinay DS, Kwon BS. 1998. Role of 4-1BB in immune responses. *Semin Immunol* **10**:481-489.  
868 DOI:10.1006/smim.1998.0157
- 869 von Heijne G. 1985. Signal sequences. The limits of variation. *J Mol Biol* **184**:99-105.  
870 DOI:10.1016/0022-2836(85)90046-4
- 871 Wang J, Guo Z, Dong Y, Kim O, Hart J, Adams A, Larsen CP, Mittler RS, Newell KA. 2003.  
872 Role of 4-1BB in allograft rejection mediated by CD8+ T cells. *Am J Transplant* **3**:543-  
873 551. DOI:10.1034/j.1600-6143.2003.00088.x
- 874 Weinberg AD. 2002. OX40: targeted immunotherapy - implications for tempering autoimmunity  
875 and enhancing vaccines. *Trends in immunology* **23**:102-109. DOI:10.1016/s1471-  
876 4906(01)02127-5
- 877 Wickner W, Schekman R. 2005. Protein translocation across biological membranes. *Science*  
878 **310**:1452-1456. DOI:10.1126/science.1113752
- 879 Winsor-Hines D, Merrill C, O'Mahony M, Rao PE, Cobbold SP, Waldmann H, Ringler DJ,  
880 Ponath PD. 2004. Induction of immunological tolerance/hyporesponsiveness in  
881 baboons with a nondepleting CD4 antibody. *J Immunol* **173**:4715-4723.  
882 DOI:10.4049/jimmunol.173.7.4715

883 Xiao Z, Mescher MF, Jameson SC. 2007. Detuning CD8 T cells: down-regulation of CD8  
884 expression, tetramer binding, and response during CTL activation. *J Exp Med*  
885 **204**:2667-2677. DOI:10.1084/jem.20062376



886 **FIGURES LEGENDS**

887

888 **Figure 1.** *CADA down-modulates the human CD4 receptor and has an immunosuppressive*  
889 *effect in the mixed lymphocyte reaction. (A)* Chemical structure of cyclotriazadisulfonamide or  
890 CADA (9-benzyl-3-methylene-1,5-di-*p*-toluenesulfonyl-1,5,9-triazacyclododecane). **(B)** Four  
891 parameter dose-response curves for CADA of cell surface human CD4. Cells were incubated  
892 with increasing concentrations of CADA and CD4 expression was measured by flow cytometry  
893 using a PE-labeled anti-human CD4 antibody (clone SK3) after 2 days for Jurkat cells (n=3) or  
894 5 days for PBMCs (n=3). CD4 expression is given as percentage of untreated control (mean  $\pm$   
895 SD). **(C)** PBMCs were co-cultured with mitomycin C inactivated RPMI1788 cells in the  
896 presence of CADA, MMF or matching DMSO concentrations. At day 5, [<sup>3</sup>H]-thymidine was  
897 added and proliferation response was measured 18h later by detecting counts per minute.  
898 Lymphocyte proliferation is given as percentage of untreated control (mean  $\pm$  SD; n=4).  
899 Multiple t-tests were performed to compare each concentration of CADA or MMF to the  
900 corresponding DMSO control with \*p<0.05 and with Holm-Sidak method as correction for  
901 multiple comparison. **(D)** Jurkat cells were exposed to different concentrations of CADA, MMF  
902 or DMSO during 2 days, after which MTS-PES was added to measure cellular metabolic  
903 activity, and read-out was done 2h later on a spectrophotometer. Metabolic activity of cells is  
904 given as percentage of untreated control (mean  $\pm$  SD; n=10). Multiple t-tests were performed  
905 to compare each concentration of CADA or MMF to the corresponding DMSO control with  
906 \*p<0.05 and with Holm-Sidak method as correction for multiple comparison.

907 **Figure supplement 1.** CADA has no effect on superantigen-activated lymphocytes.

908 **Figure supplement 2.** CADA does not exert cytotoxicity.

909

910 **Figure 2.** *Reduced CD4 surface expression affects lymphocyte proliferation in the MLR.*  
911 PBMCs were co-cultured with mitomycin C inactivated RPMI1788 cells in the presence of  
912 CADA (left panel) or the anti-CD4 antibody Clenoliximab (right panel). At day 5, one sample  
913 was used to determine cell surface human CD4 expression using flow cytometry. In parallel,  
914 [<sup>3</sup>H]-thymidine was added to an identical sample and proliferation response was measured by  
915 detecting counts per minute 18h later. To avoid steric hindrance for the detection of CD4, the  
916 monoclonal anti-human CD4 antibody clone OKT4 was used as this antibody binds to the D3  
917 domain of CD4, while Clenoliximab binds to the D1 domain. Human CD4 expression (open  
918 blue symbols with dotted line), given as percentage of untreated control, is plotted on the left  
919 Y-axis (mean  $\pm$  SD; n=4), and lymphocyte proliferation (solid red symbols with solid line), given  
920 as percentage of DMSO control for CADA and as percentage of ProClin 300 control for  
921 Clenoliximab is plotted on the right Y-axis (mean  $\pm$  SD; n=4).

922

923 **Figure 3.** *CADA suppresses lymphocyte proliferation after activation by CD3/CD28 beads or*  
924 *PHA.* PBMCs were pre-incubated with CADA (10  $\mu$ M) or DMSO during 3 days, after which they  
925 were activated by CD3/CD28 beads (left panels) or PHA (right panels). At 4h, 1d, 2d, 3d or 4d  
926 post activation, [<sup>3</sup>H]-thymidine was added and proliferation response was measured by  
927 detecting counts per minute (cpm) 22h later. Individual cpm values are shown for stimulated  
928 PBMCs with DMSO-treated cells as open symbols and CADA-treated cells as solid red dots.  
929 Horizontal lines indicate the mean values of 4 to 6 donors. Insert panels below the graph show  
930 intra-donor treatment effect on the proliferation response at day 2 post activation (each donor  
931 is indicated separately). A paired t-test was performed to compare CADA to DMSO with  
932 \*p<0.05.

933

934 **Figure 4.** *CADA inhibits upregulation of CD4 and CD8 after activation by CD3/CD28 beads or*  
935 *PHA. (A and B)* Cell surface CD4 (A) and CD8 (B) receptor expression was measured by flow  
936 cytometry just before activation (0h) and 4h, 1d, 2d, 3d or 4d post activation with CD3/CD28  
937 (left) or PHA (right). Mean fluorescence intensity (MFI) of human CD4 or CD8 receptor  
938 expression is shown for 4 donors of PBMCs (indicated separately) with DMSO-treated samples  
939 as a dotted line and CADA-treated samples as a full line.

940 **Figure supplement 1.** CADA suppresses CD4 and CD8 receptor upregulation.

941

942 **Figure 5.** *CADA dose-dependently inhibits CD8<sup>+</sup> T cell proliferation and cytotoxic T cell*  
943 *function. (A)* PBMCs (red), purified CD4<sup>+</sup> T cells (blue) or purified CD8<sup>+</sup> T cells (green) were  
944 co-cultured with mitomycin C inactivated RPMI1788 cells in the presence of different doses of  
945 CADA. At day 5, [<sup>3</sup>H]-thymidine was added and proliferation response was measured by  
946 detecting counts per minute (cpm) 18h later. Lymphocyte proliferation is given as percentage  
947 of the corresponding DMSO control (mean  $\pm$  SD; n=6). **(B)** Purified CD8<sup>+</sup> T cells were pre-  
948 incubated with CADA (10  $\mu$ M) or DMSO during 3 days, after which they were activated by  
949 CD3/CD28 beads or PHA. At 24h post activation, [<sup>3</sup>H]-thymidine was added and proliferation  
950 response was measured by detecting cpm 20h later. Graphs show intra-donor treatment effect  
951 on the proliferation response (each donor is indicated separately). A paired t-test was  
952 performed to compare CADA to DMSO with \*p<0.05. **(C)** PBMCs were cultured in medium  
953 alone (black) or were co-cultured with inactivated RPMI1788 cells in the absence (white) or  
954 presence (red) of increasing doses of CADA during 6 days. Next, PBMCs were co-cultured  
955 with <sup>51</sup>Cr-loaded RPMI1788 cells for 4h, after which supernatant was collected and <sup>51</sup>Cr release  
956 was quantified. To measure spontaneous and maximum release of <sup>51</sup>Cr, medium or saponin  
957 was added to the <sup>51</sup>Cr-loaded RPMI1788 cells, respectively. The mean percentage of specific

958 lysis was calculated by using the following formula: % specific lysis = (experimental release –  
959 spontaneous release) / (maximum release – spontaneous release) x 100. Values of one  
960 experiment are shown.

961

962 **Figure 6.** *CADA decreases CD25 upregulation and reduces intracellular pSTAT5 and CTPS1*  
963 *levels in activated PBMCs. (A)* PBMCs were pre-incubated with CADA (10  $\mu$ M) or DMSO for  
964 3 days, after which they were activated with PHA. Cellular surface CD25 expression was  
965 measured on gated CD4<sup>+</sup> (left panel) and CD8<sup>+</sup> (right panel) T cells by flow cytometry just  
966 before activation (0h) and 4h, 1d, 2d, 3d or 4d post activation. Mean fluorescence intensity  
967 (MFI) of CD25 expression is shown for 4 donors of PBMCs (indicated separately) with DMSO-  
968 treated samples as a dotted line with open symbols and CADA-treated cells as a full purple  
969 line with solid symbols. Insert panels below each graph show intra-donor treatment effect on  
970 CD25 expression at day 3 post activation. A paired t-test was performed to compare CADA to  
971 DMSO with \* $p < 0.05$ . **(B – D)** PBMCs were pre-incubated with CADA or DMSO during 3 days,  
972 after which they were left unstimulated or were activated with CD3/CD28 beads or PHA. **(B**  
973 **and C)** At day 2, half of the samples were boosted with IL-2. Cell surface CD25 receptor (B)  
974 and intracellular pSTAT5 (C) expression were simultaneously measured by flow cytometry.  
975 Mean fluorescence intensity (MFI) of CD25 and pSTAT5 is shown (mean  $\pm$  SD; n=4). Multiple  
976 t-tests were performed to compare CADA (solid bars) to DMSO (open bars) for each condition  
977 with \* $p < 0.05$  and with Holm-Sidak method as correction for multiple comparison. **(D)** At day 2  
978 post activation, cells were lysed and CTPS1 expression was detected by western blotting.  
979 Clathrin was used as protein loading control.

980 **Figure supplement 1.** CADA inhibits CD25 upregulation after activation by CD3/CD28 beads.

981 **Figure supplement 2.** CADA reduces the levels of soluble CD25 protein.

982

983 **Figure 7.** *CADA inhibits cytokine release by activated PBMCs and suppresses the*  
984 *upregulation of co-stimulatory molecules. (A)* PBMCs were stimulated with mitomycin C  
985 inactivated RPMI1788 cells (MLR), CD3/CD28 beads or PHA and exposed to CADA (10  $\mu$ M).  
986 Supernatants were collected on day 5 (MLR; n=5) or day 3 (beads and PHA; n=4) post  
987 stimulation and cytokine levels were determined by Bio-Plex assay. Bars represent mean  $\pm$   
988 SD, with individual values shown as open (DMSO) or solid (CADA) symbols. Note that cytokine  
989 levels in the MLR samples are plotted on a logarithmic scale. Welch's corrected t-tests were  
990 performed to compare CADA to DMSO with \* $p < 0.05$ . **(B)** PBMCs were pre-incubated with  
991 CADA (10  $\mu$ M) or DMSO during 3 days, after which they were activated by CD3/CD28 beads  
992 or PHA. Cell surface CD28 expression was measured on gated CD4<sup>+</sup> T cells by flow cytometry  
993 on d3 post activation. Cell surface expression of OX40 and 4-1BB was measured on total  
994 PBMCs by flow cytometry on d2 post activation. Panels represent intra-donor treatment effect

995 of CADA on receptor expression for 4 donors of PBMCs (indicated separately). Paired t-tests  
996 were performed to compare CADA to DMSO with  $*p < 0.05$ .

997 **Figure supplement 1.** CADA reduces the upregulation of CD28 on activated lymphocytes.

998

999 **Figure 8.** *CADA completely suppresses the upregulation of 4-1BB.* PBMCs were pre-  
1000 incubated with CADA (10  $\mu$ M) or DMSO during 3 days, after which they were activated by  
1001 CD3/CD28 beads or PHA. Cell surface 4-1BB expression was measured on gated CD4<sup>+</sup> and  
1002 CD8<sup>+</sup> T cells by flow cytometry on the indicated time points post activation. The average MFI  
1003 of 6 donors of PBMCs is shown (mean  $\pm$  SD). Multiple t-tests were performed to compare  
1004 CADA to DMSO for each condition with  $*p < 0.05$  and with Holm-Sidak method as correction for  
1005 multiple comparison.

1006

1007 **Figure 9.** *CADA dose-dependently and reversibly suppresses the cellular expression of*  
1008 *4-1BB. (A)* Schematic representation of the expected mRNA and protein products of the tGFP-  
1009 2A-RFP construct. **(B-D)** HEK293T cells were transiently transfected with the different  
1010 constructs. CADA was added 6h post transfection and cellular expression of each receptor  
1011 was determined by measuring tGFP levels by flow cytometry. **(B)** Four parameter dose-  
1012 response curves for CADA of human CD4tGFP-2A-RFP and human 4-1BBtGFP-2A-RFP.  
1013 Cells were collected 24h post transfection and tGFP was measured by flow cytometry.  
1014 Receptor levels in CADA-treated samples are normalized to the corresponding DMSO control.  
1015 Values are mean  $\pm$  SD;  $n \geq 3$ . **(C)** Cells were transfected with 4-1BBtGFP-2A-RFP and given  
1016 DMSO (CTR) or treated with CADA for 72h. In parallel, CADA-treatment was terminated after  
1017 24h (CADA wash). These cells were washed profoundly and given control medium for the  
1018 duration of the experiment. At the indicated time points, cells were collected and tGFP was  
1019 measured by flow cytometry. The average MFI of tGFP is shown (mean  $\pm$  SD;  $n=2$ ). Of note is  
1020 that the SD of the CADA samples (red curve) is too small to be visible on the graph. **(D)** Cells  
1021 were collected 24h post transfection and tGFP was measured by flow cytometry. Protein levels  
1022 in CADA-treated samples are shown, normalized to the corresponding DMSO control (set as  
1023 1.00). Bars are mean  $\pm$  SD;  $n \geq 3$ .

1024 **Figure supplement 1.** CADA reversibly down-modulates hCD4.

1025 **Figure supplement 2.** CADA differentially affects the protein expression levels of co-  
1026 stimulatory receptors in transfected cells.

1027

1028 **Figure 10.** *CADA inhibits 4-1BB protein biogenesis via a signal peptide-dependent way by*  
1029 *blocking the co-translational translocation of 4-1BB into the endoplasmic reticulum. (A)*  
1030 Schematic representation of the constructs used. In the hmCD4 construct, the signal peptide  
1031 (SP) and the first 7 amino acids of the mature protein are of human CD4 (indicated in blue),

1032 whereas in the 4-1BBmCD4 construct the SP and the 7 AA of mature 4-1BB (indicated in red)  
1033 are fused to mouse CD4. During pre-protein biogenesis, the SP is cleaved off from the mature  
1034 protein. The constructs express the mature protein of mouse CD4 that is C-terminally fused to  
1035 tGFP as shown in Figure 9A. **(B)** HEK293T cells were plated and transfected with the mCD4  
1036 (black; n=3), hmCD4 (blue; n=3) and 4-1BBmCD4 (red; n=4) constructs. CADA was added 6h  
1037 post transfection and expression of tGFP was measured by flow cytometry 24h post  
1038 transfection. The tGFP expression is given as percentage of DMSO control (mean  $\pm$  SD). IC<sub>50</sub>  
1039 values are 0.84  $\mu$ M, 0.38  $\mu$ M and >50  $\mu$ M for hmCD4, 4-1BBmCD4 and mCD4, respectively.  
1040 **(C and D)** *In vitro* translation and translocation of 4-1BB and mCD4 in a radiolabeled cell-free  
1041 rabbit reticulocyte lysate system. **(C)** Graph shows the calculated translocation efficiencies.  
1042 Signal intensities of the pre-protein and translocated protein fraction were used to calculate  
1043 the translocation efficiency, i.e., translocated fraction/(pre-protein + translocated fraction). Bars  
1044 show mean  $\pm$  SD; n=2. **(D)** Representative autoradiogram of the *in vitro* translated and  
1045 translocated wild-type 4-1BB and mCD4 proteins. For mCD4 a truncated form of 250 residues  
1046 was used without glycosylation sites and transmembrane region. In the presence of  
1047 membranes, the pre-protein (open arrowhead) of mCD4 is translocated into the ER lumen and  
1048 the SP is cleaved off, resulting in a faster migrating mature protein (black arrowhead). For wild-  
1049 type 4-1BB, the SP is cleaved off but the protein is also glycosylated, resulting in a slower  
1050 migrating mature protein (black arrowhead). **(E)** Cartoon showing CADA inhibiting the co-  
1051 translational translocation of 4-1BB protein across the ER membrane.

1052 **Figure supplement 1.** Cell free *in vitro* translation/translocation assay to study the co-  
1053 translational translocation of proteins.

1054

1055 **Figure 11.** *Mode of action of CADA.* CADA has immunosuppressive activity mainly on CD8<sup>+</sup>  
1056 T cells by inhibition of 4-1BB protein biogenesis is a signal peptide-dependent way.

# Figure 1

## A

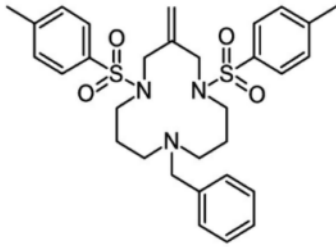

## B

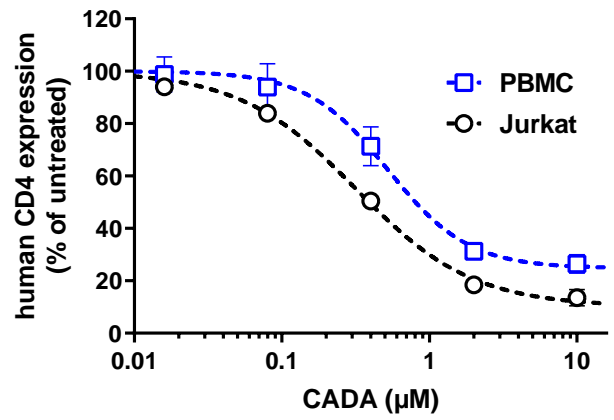

## C

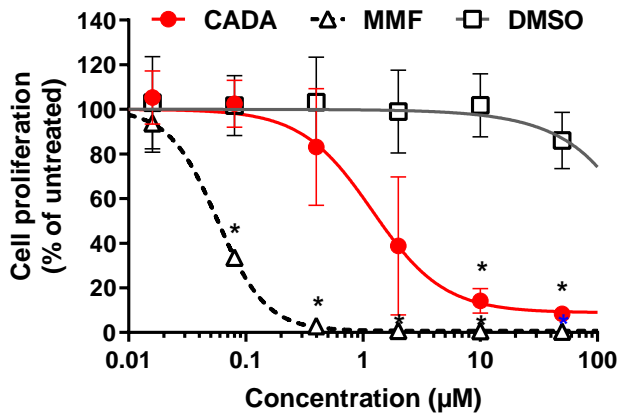

## D

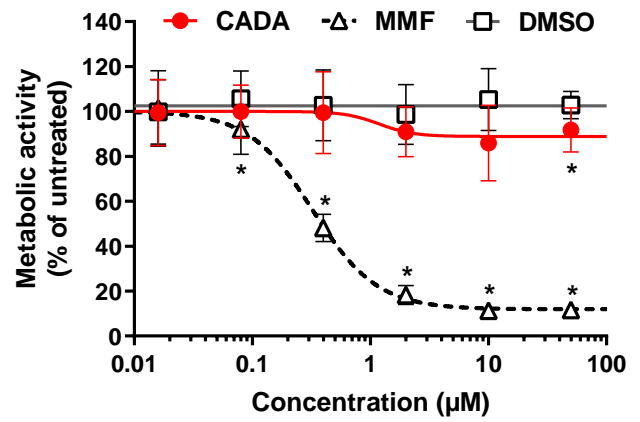

# Figure 2

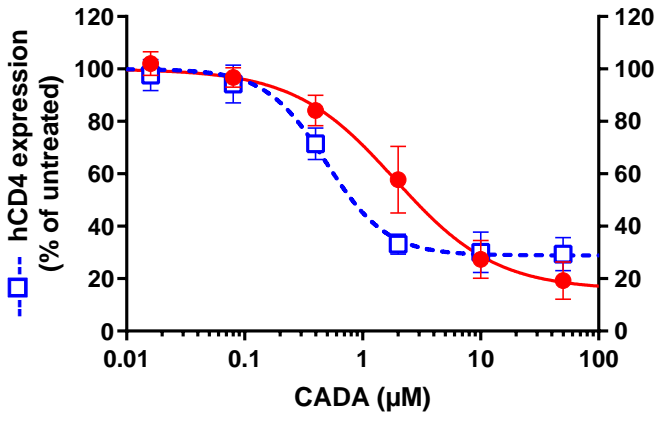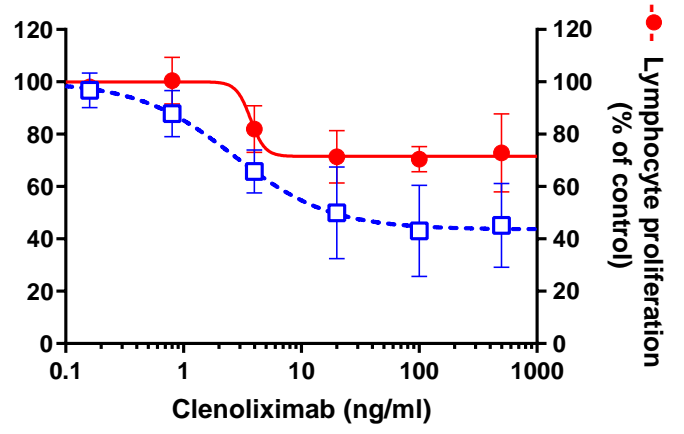



Figure 3

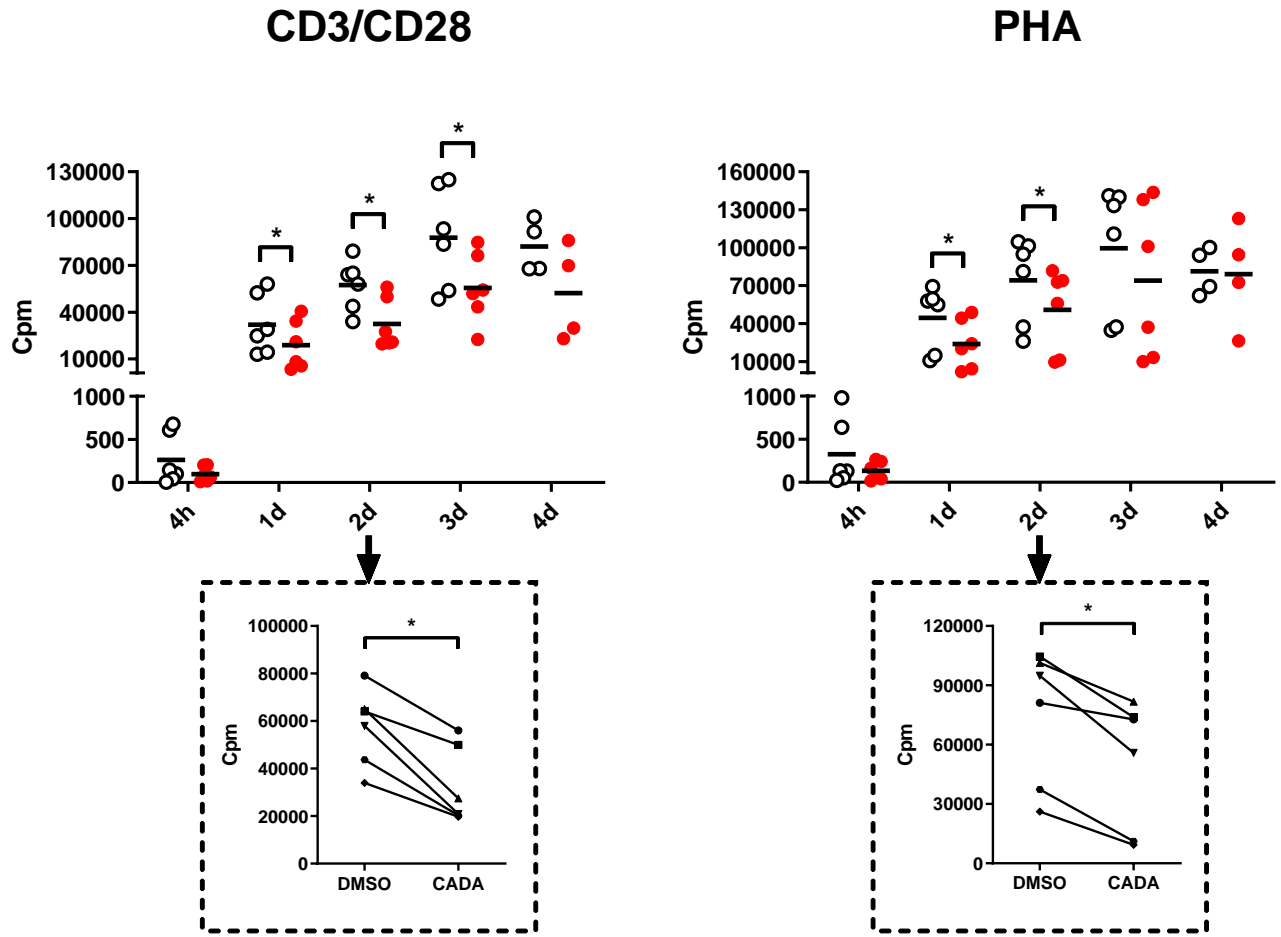

**Figure 4**

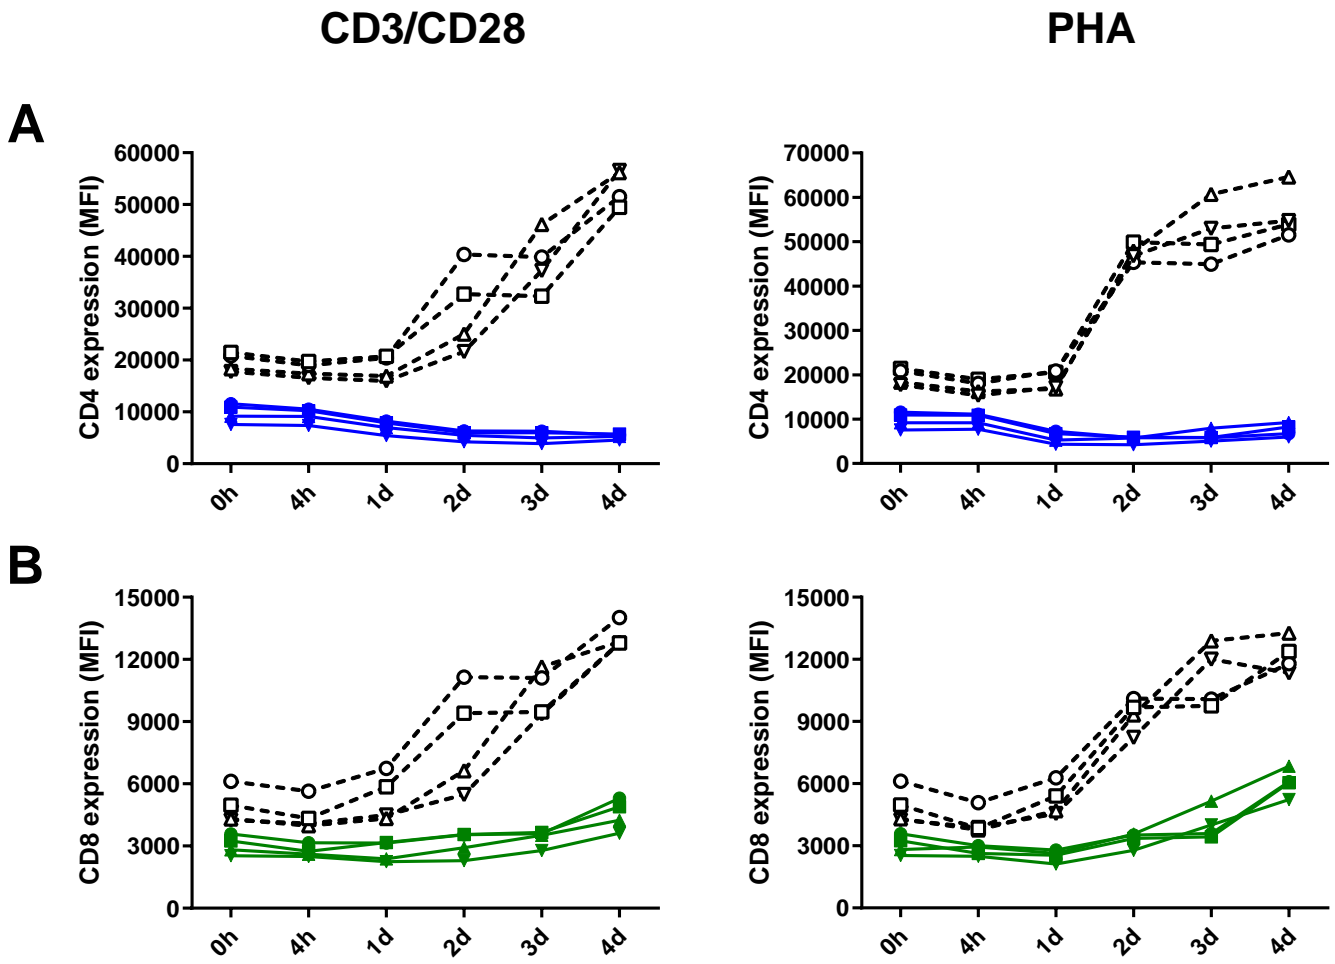

Figure 5

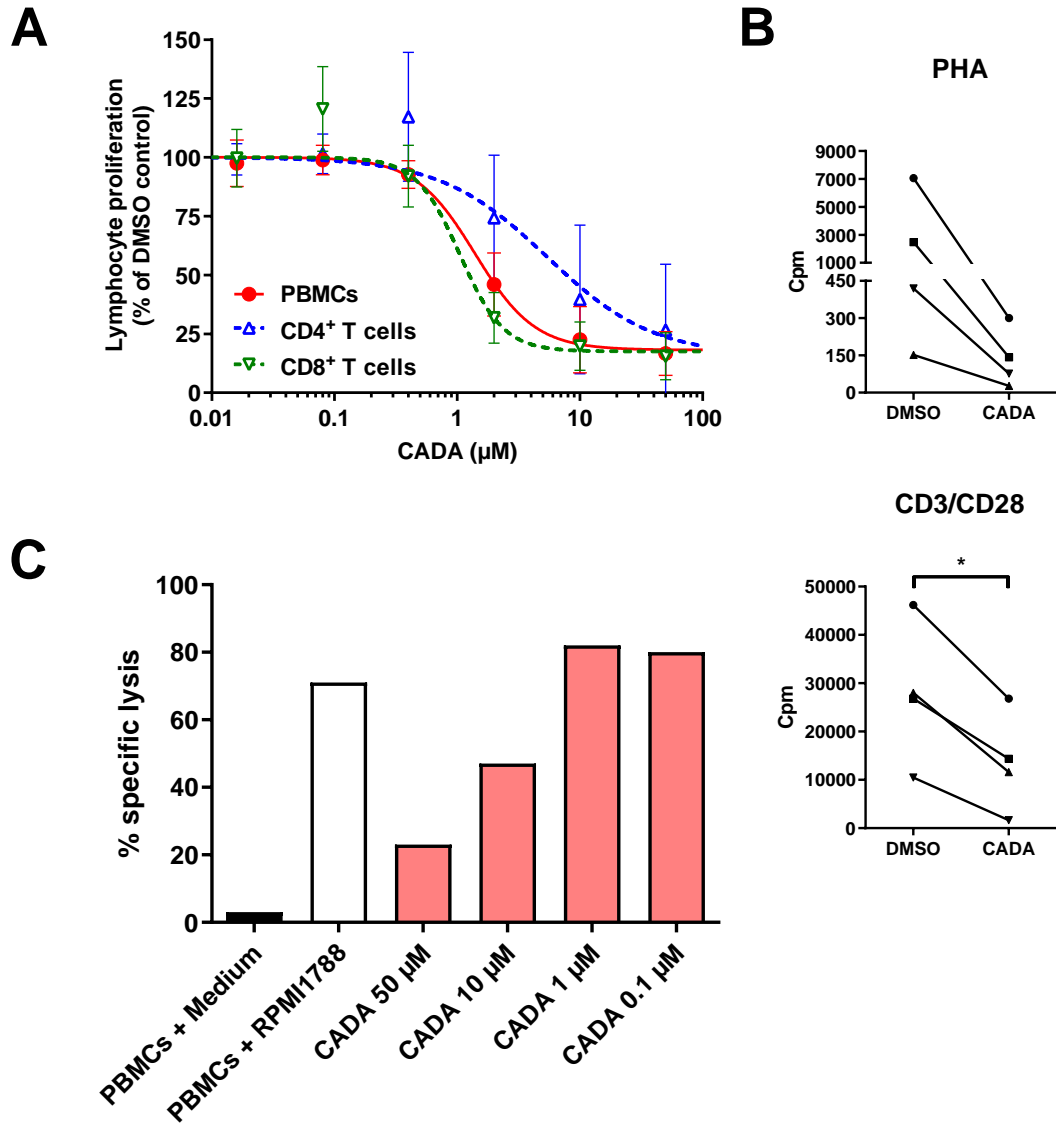

**Figure 6**

**A**

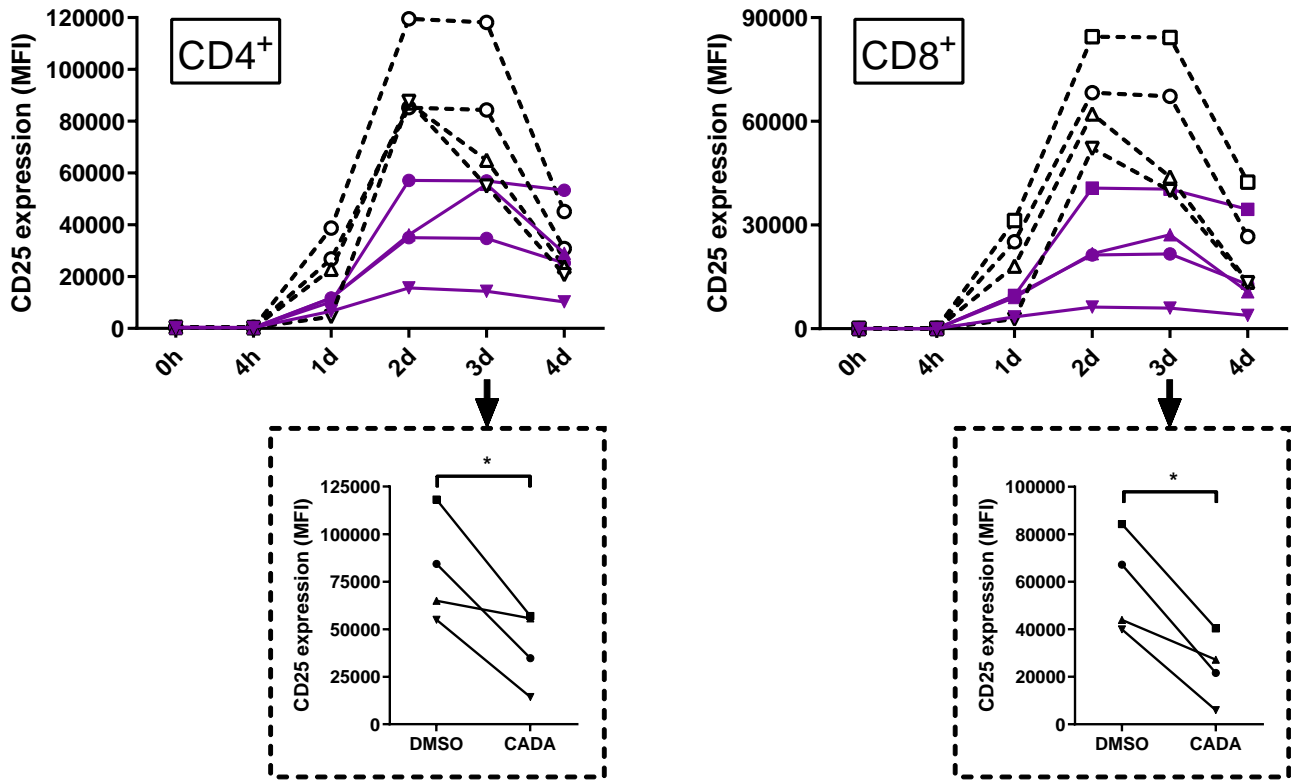

**B**

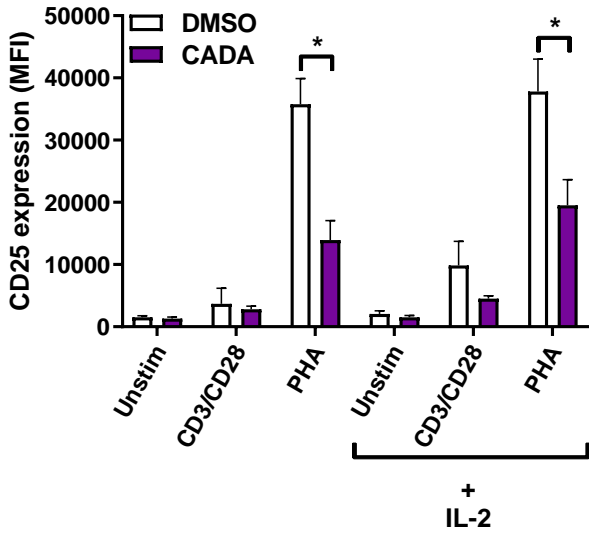

**C**

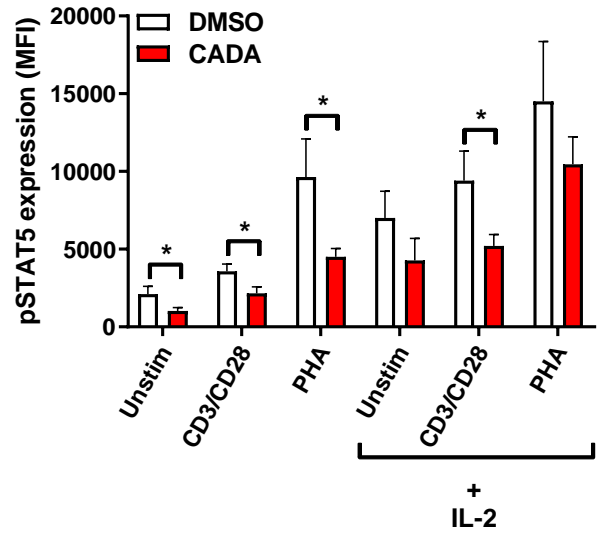

**D**

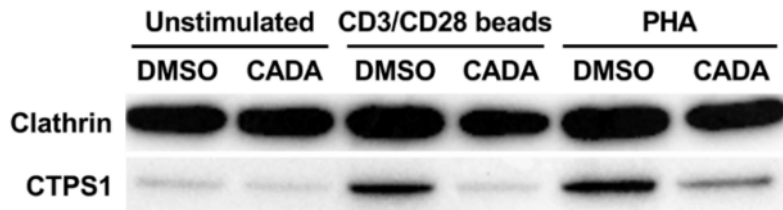

# Figure 7

## A

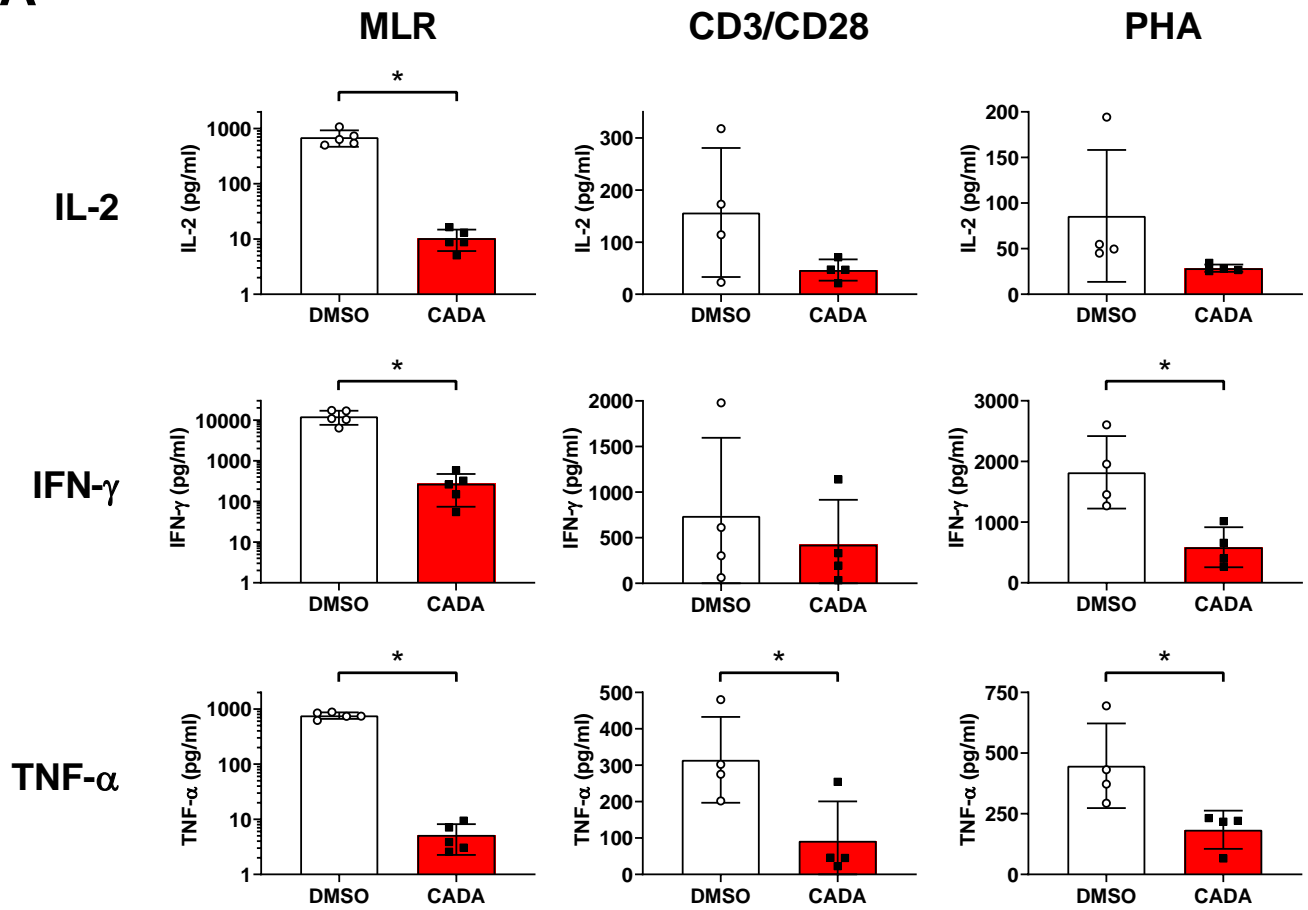

## B

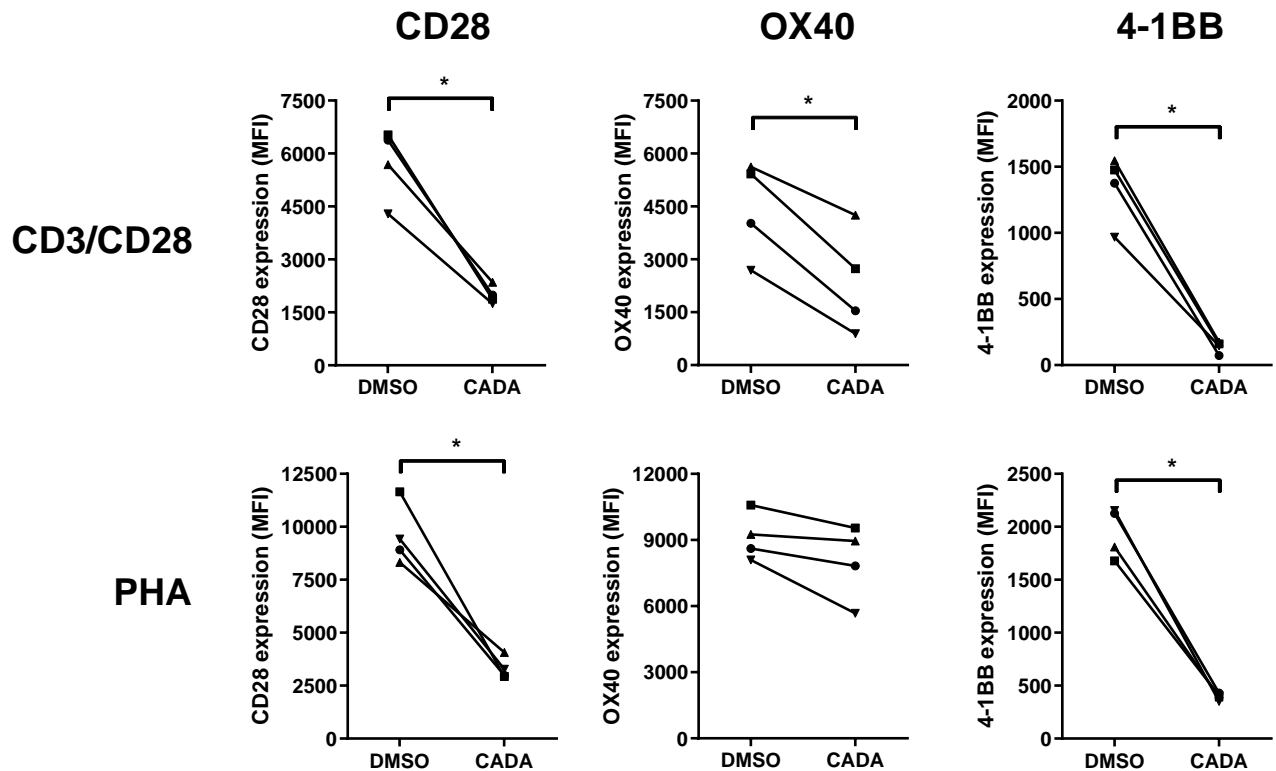

# Figure 8

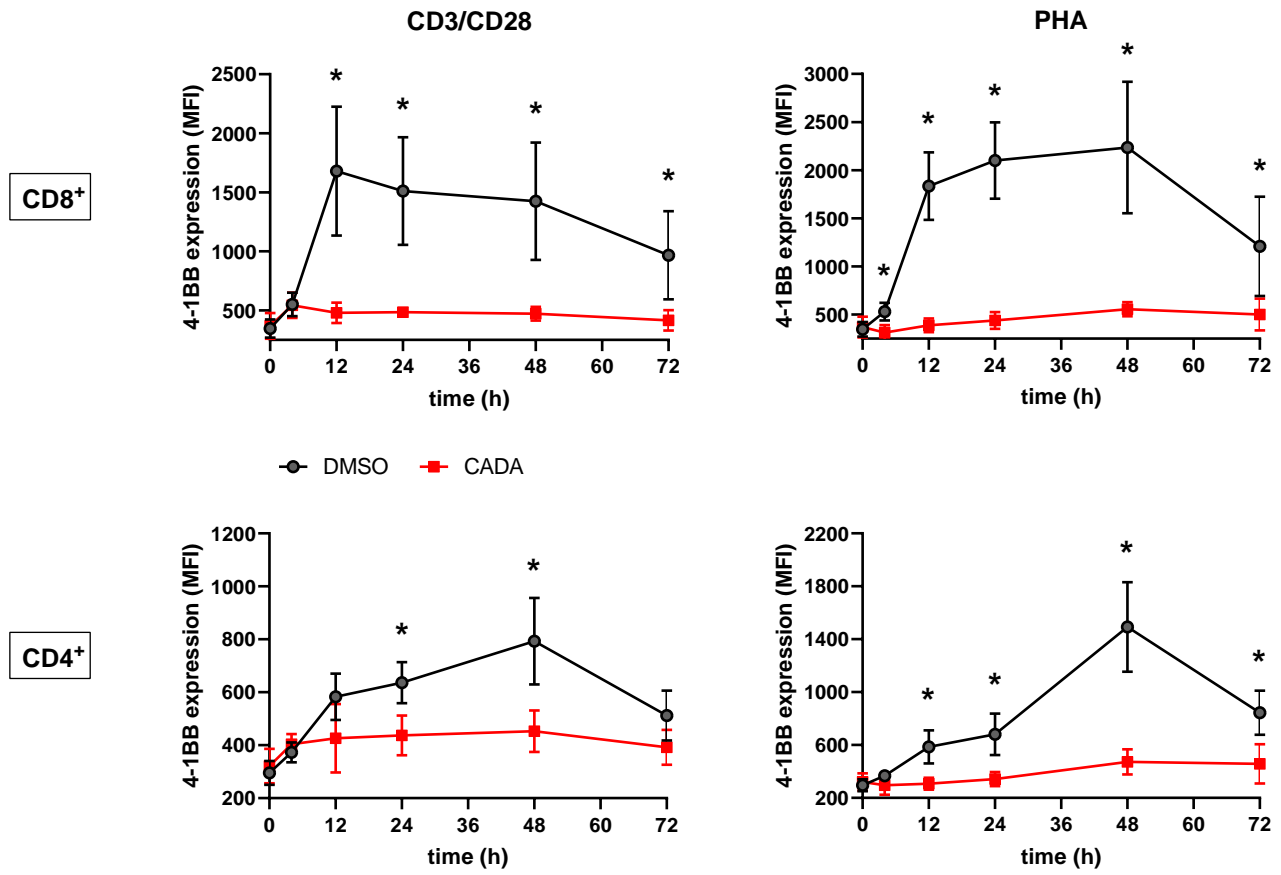

# Figure 9

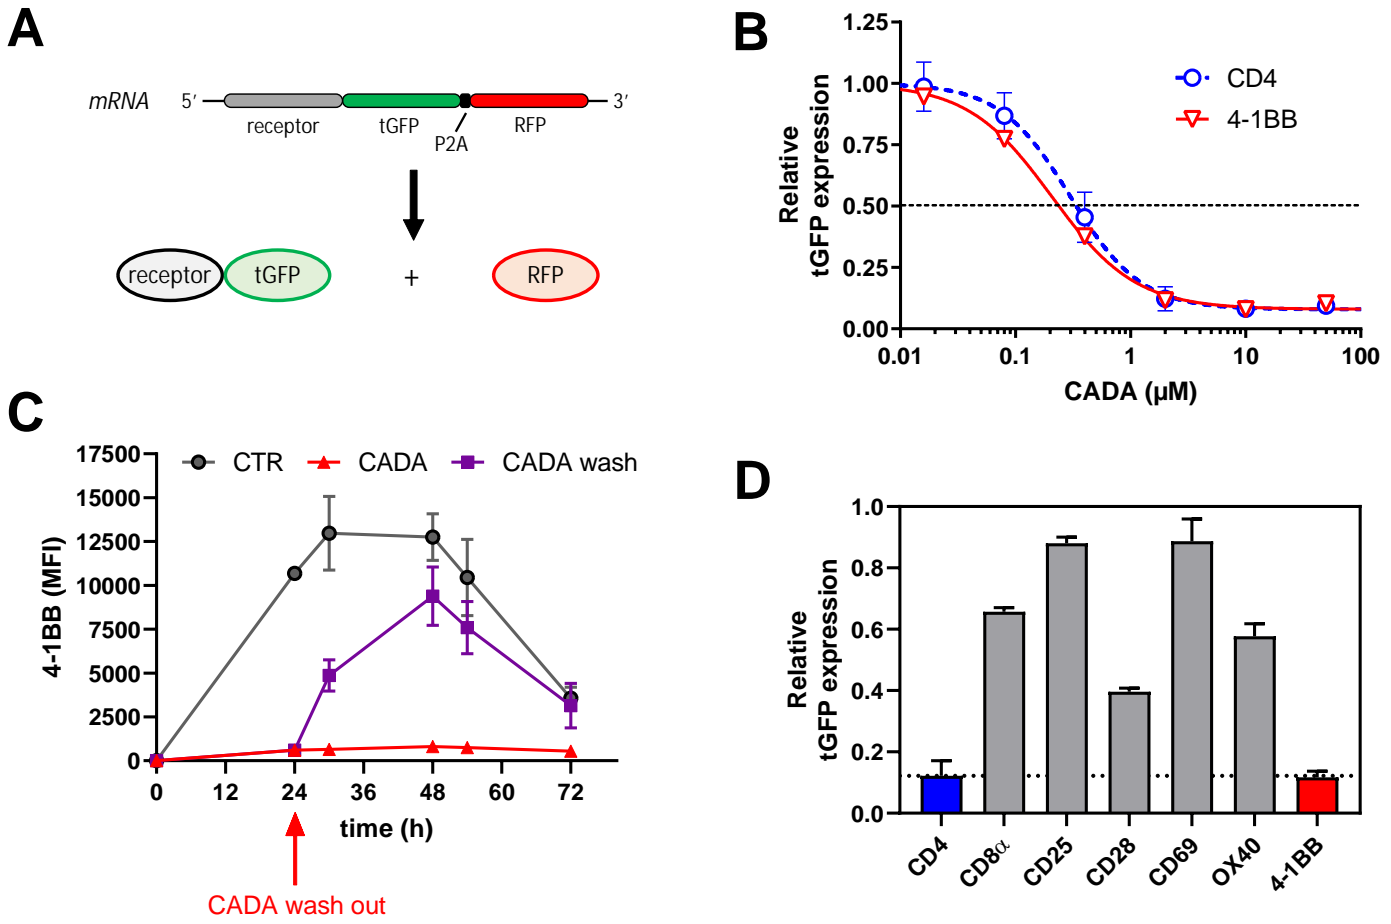





**Figure 11**

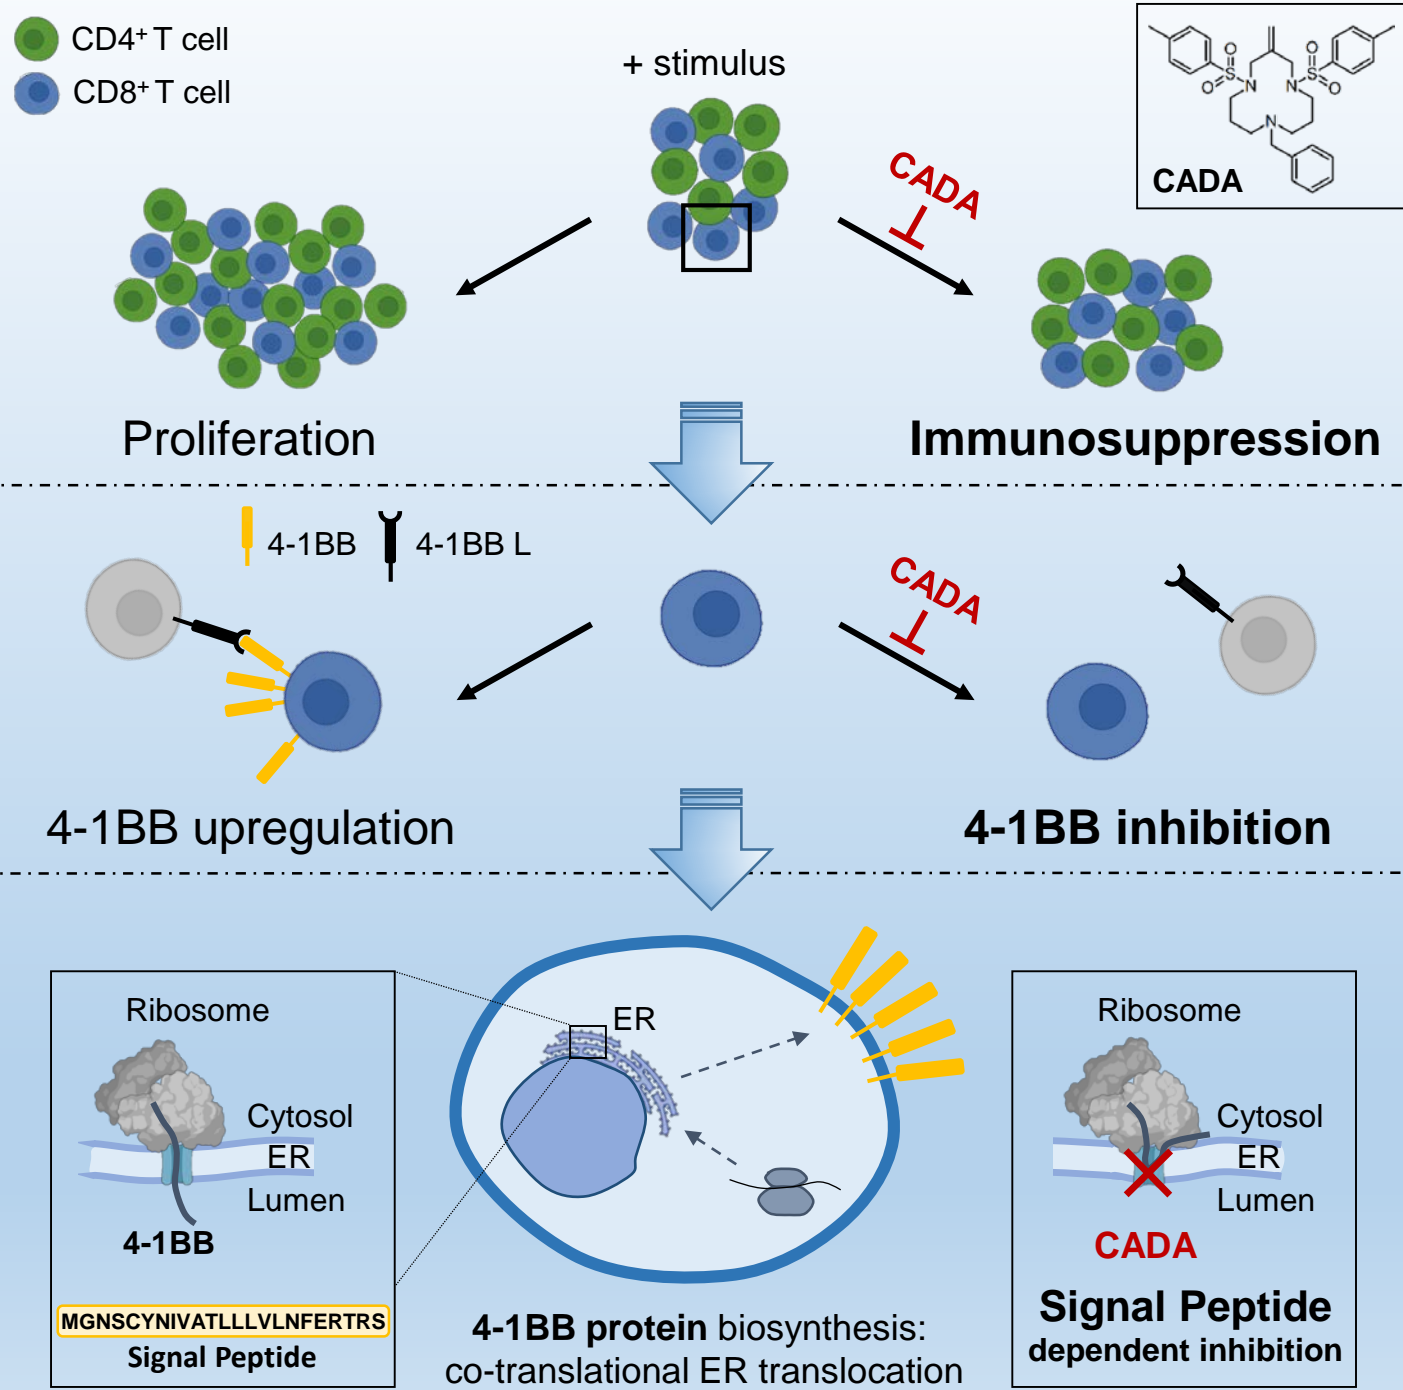

Source: https://www.biorxiv.org/content/10.1101/2020.12.30.424816v1.full.pdf
